# Supplementary material
Source: publisher figshare collection journal article supplement (https://karger.figshare.com/ndownloader/files/25593734)
Supplement: Supplementary file 1 [file 25593734]

## Sheet: Predicted module results
#Transcript_ID	Gene_ID(Gene_Name)	Mirna_Name(miRBase_version)	miTG-score	Score
>ENST00000583492	ENSG00000265688(MAFG-AS1)	hsa-miR-3173-5p	-21	0.984
17:754-779	9mer	0.032
17:793-811	7mer	0.025
17:623-637	8mer	0.021
>ENST00000583492	ENSG00000265688(MAFG-AS1)	hsa-miR-619-5p	-21	0.979
17:851-869	9mer	0.067
17:772-790	6mer	0.004
17:631-645	6mer	0.003
>ENST00000582106	ENSG00000265688(MAFG-AS1)	hsa-miR-619-5p	-21	0.972
17:1541-1559	9mer	0.043
17:1672-1692	7mer	0.015
17:355-376	7mer	0.004
17:91-111	6mer	0.003
17:1462-1480	6mer	0.002
17:1321-1335	6mer	0.002
>ENST00000582106	ENSG00000265688(MAFG-AS1)	hsa-miR-6758-5p	-21	0.97
17:1783-1800	8mer	0.068
>ENST00000583492	ENSG00000265688(MAFG-AS1)	hsa-miR-7976	-21	0.962
17:793-811	8mer	0.045
17:762-779	7mer	0.012
17:623-637	6mer	0.007
>ENST00000583492	ENSG00000265688(MAFG-AS1)	hsa-miR-6799-3p	-21	0.961
17:759-779	8mer	0.028
17:791-811	7mer	0.025
17:612-637	7mer	0.011
>ENST00000582106	ENSG00000265688(MAFG-AS1)	hsa-miR-6856-5p	-21	0.925
17:1778-1799	7mer	0.052
>ENST00000583492	ENSG00000265688(MAFG-AS1)	hsa-miR-6892-3p	-21	0.922
17:212-238	8mer	0.051
>ENST00000582106	ENSG00000265688(MAFG-AS1)	hsa-miR-335-3p	-21	0.921
17:1809-1821	9mer	0.051
>ENST00000582106	ENSG00000265688(MAFG-AS1)	hsa-miR-1303	-21	0.916
17:1781-1802	8mer	0.05
>ENST00000582106	ENSG00000265688(MAFG-AS1)	hsa-miR-3173-5p	-21	0.911
17:1444-1469	9mer	0.018
17:1483-1501	7mer	0.012
17:1313-1327	8mer	0.009
17:162-170	6mer	0.004
17:1850-1875	6mer	0.004
17:213-230	6mer	0.002
>ENST00000583492	ENSG00000265688(MAFG-AS1)	hsa-miR-6131	-21	0.91
17:894-920	7mer	0.038
17:106-131	8mer+wobble	0.007
17:586-610	6mer	0.003
>ENST00000583492	ENSG00000265688(MAFG-AS1)	hsa-miR-3663-5p	-21	0.902
17:897-920	8mer	0.047
>ENST00000583492	ENSG00000265688(MAFG-AS1)	hsa-miR-4731-5p	-21	0.888
17:845-870	7mer	0.025
17:894-921	6mer	0.007
17:92-117	7mer	0.006
17:773-790	7mer	0.006
>ENST00000583492	ENSG00000265688(MAFG-AS1)	hsa-miR-6778-3p	-21	0.883
17:872-882	8mer	0.044
>ENST00000582106	ENSG00000265688(MAFG-AS1)	hsa-miR-1913	-21	0.881
17:1810-1835	9mer	0.033
17:207-232	6mer	0.003
17:1436-1456	6mer	0.002
17:1838-1860	6mer	0.002
17:1447-1466	6mer	0.002
17:253-279	6mer	0.001
>ENST00000583492	ENSG00000265688(MAFG-AS1)	hsa-miR-3689d	-21	0.875
17:94-112	8mer	0.019
17:337-358	7mer	0.009
17:630-643	6mer	0.005
17:402-409	8mer	0.004
17:375-396	6mer	0.003
17:456-480	6mer	0.002
17:397-421	6mer	0.002
>ENST00000583492	ENSG00000265688(MAFG-AS1)	hsa-miR-146b-3p	-21	0.871
17:787-811	7mer	0.025
17:764-779	7mer	0.011
17:619-637	6mer	0.005
>ENST00000583492	ENSG00000265688(MAFG-AS1)	hsa-miR-874-3p	-21	0.869
17:792-811	7mer	0.031
17:761-779	7mer	0.007
17:759-775	6mer	0.004
>ENST00000582106	ENSG00000265688(MAFG-AS1)	hsa-miR-7976	-21	0.866
17:1483-1501	8mer	0.024
17:1452-1469	7mer	0.008
17:1856-1875	6mer	0.004
17:1313-1327	6mer	0.003
17:154-170	6mer	0.003
>ENST00000583492	ENSG00000265688(MAFG-AS1)	hsa-miR-6754-5p	-21	0.865
17:600-623	8mer	0.016
17:145-163	7mer	0.014
17:319-337	7mer	0.009
17:625-646	8mer+mismatch	0.002
>ENST00000582106	ENSG00000265688(MAFG-AS1)	hsa-miR-532-3p	-21	0.861
17:1700-1716	8mer	0.017
17:1559-1579	7mer	0.011
17:1543-1570	7mer	0.006
17:493-517	6mer	0.002
17:1233-1260	6mer	0.002
17:572-591	7mer	0.002
17:1249-1264	6mer	0.001
>ENST00000582106	ENSG00000265688(MAFG-AS1)	hsa-miR-6799-3p	-21	0.859
17:1449-1469	8mer	0.016
17:1481-1501	7mer	0.012
17:1302-1327	7mer	0.005
17:1853-1875	6mer	0.003
17:152-170	6mer	0.002
17:215-230	6mer	0.002
>ENST00000583492	ENSG00000265688(MAFG-AS1)	hsa-miR-1286	-21	0.855
17:693-718	8mer	0.04
>ENST00000582106	ENSG00000265688(MAFG-AS1)	hsa-miR-4731-5p	-21	0.851
17:1535-1560	7mer	0.015
17:91-111	8mer	0.006
17:1584-1611	6mer	0.004
17:1676-1692	6mer	0.004
17:1463-1480	7mer	0.003
17:353-377	7mer	0.003
17:664-689	7mer	0.003
17:471-494	6mer	0.002
>ENST00000583492	ENSG00000265688(MAFG-AS1)	hsa-miR-7155-3p	-21	0.843
17:172-191	9mer	0.038
>ENST00000582106	ENSG00000265688(MAFG-AS1)	hsa-miR-204-3p	-21	0.842
17:1538-1559	7mer	0.015
17:1674-1692	7mer	0.012
17:358-376	7mer	0.004
17:1460-1480	6mer	0.003
17:91-111	6mer	0.003
17:467-493	6mer	0.002
>ENST00000583492	ENSG00000265688(MAFG-AS1)	hsa-miR-578	-21	0.834
17:929-953	7mer	0.029
17:801-825	6mer	0.008
>ENST00000583492	ENSG00000265688(MAFG-AS1)	hsa-miR-211-3p	-21	0.832
17:144-162	8mer	0.028
17:315-337	6mer	0.003
17:588-614	6mer	0.003
17:607-622	6mer	0.002
>ENST00000583492	ENSG00000265688(MAFG-AS1)	hsa-miR-7113-5p	-21	0.83
17:149-164	8mer	0.029
17:605-623	8mer	0.007
>ENST00000583492	ENSG00000265688(MAFG-AS1)	hsa-miR-6752-3p	-21	0.83
17:755-777	8mer	0.025
17:621-636	7mer	0.012
>ENST00000582106	ENSG00000265688(MAFG-AS1)	hsa-miR-1250-3p	-21	0.825
17:1810-1816	8mer	0.036
>ENST00000583492	ENSG00000265688(MAFG-AS1)	hsa-miR-4456	-21	0.819
17:199-208	8mer	0.035
>ENST00000582106	ENSG00000265688(MAFG-AS1)	hsa-miR-874-3p	-21	0.815
17:1482-1501	7mer	0.017
17:1827-1834	6mer	0.007
17:1451-1469	7mer	0.003
17:1844-1860	6mer	0.003
17:1449-1465	6mer	0.003
17:211-231	7mer	0.002
>ENST00000582106	ENSG00000265688(MAFG-AS1)	hsa-miR-6131	-21	0.815
17:1584-1610	7mer	0.023
17:1760-1778	6mer	0.004
17:678-703	8mer+wobble	0.003
17:100-112	6mer	0.003
17:1276-1300	6mer	0.002
>ENST00000582106	ENSG00000265688(MAFG-AS1)	hsa-miR-24-3p	-21	0.811
17:1827-1845	8mer	0.017
17:1381-1399	7mer	0.008
17:1062-1084	8mer	0.004
17:1574-1592	6mer	0.003
17:1121-1143	8mer	0.002
>ENST00000583492	ENSG00000265688(MAFG-AS1)	hsa-miR-4732-3p	-21	0.806
17:788-810	8mer	0.034
>ENST00000583492	ENSG00000265688(MAFG-AS1)	hsa-miR-6744-3p	-21	0.795
17:230-255	9mer	0.021
17:182-203	6mer	0.009
17:314-328	6mer	0.003
>ENST00000582106	ENSG00000265688(MAFG-AS1)	hsa-miR-7156-3p	-21	0.79
17:1721-1747	8mer	0.02
17:981-1006	7mer	0.004
17:1159-1184	8mer	0.003
17:1040-1066	8mer	0.002
17:1100-1124	7mer	0.002
17:108-127	6mer	0.001
>ENST00000583492	ENSG00000265688(MAFG-AS1)	hsa-miR-6783-3p	-21	0.789
17:137-150	8mer	0.015
17:881-908	8mer+wobble	0.014
17:350-363	6mer	0.004
>ENST00000582106	ENSG00000265688(MAFG-AS1)	hsa-miR-1286	-21	0.789
17:1383-1408	8mer	0.023
17:111-126	8mer	0.005
17:423-434	6mer	0.002
17:140-155	6mer	0.001
>ENST00000583492	ENSG00000265688(MAFG-AS1)	hsa-miR-6878-3p	-21	0.787
17:185-204	7mer	0.019
17:115-129	6mer	0.008
17:671-675	6mer	0.005
>ENST00000583492	ENSG00000265688(MAFG-AS1)	hsa-miR-3944-5p	-21	0.784
17:695-720	7mer	0.022
17:410-435	7mer	0.004
17:75-94	6mer	0.003
17:332-354	6mer	0.003
>ENST00000583492	ENSG00000265688(MAFG-AS1)	hsa-miR-532-3p	-21	0.779
17:869-889	7mer	0.018
17:853-880	7mer	0.009
17:543-570	6mer	0.003
17:559-574	6mer	0.001
>ENST00000583492	ENSG00000265688(MAFG-AS1)	hsa-miR-3136-3p	-21	0.778
17:165-191	8mer	0.031
>ENST00000582106	ENSG00000265688(MAFG-AS1)	hsa-miR-188-3p	-21	0.768
17:1698-1715	7mer	0.007
17:1555-1579	7mer	0.005
17:1176-1195	7mer	0.005
17:999-1018	7mer	0.003
17:1117-1136	7mer	0.003
17:1058-1077	7mer	0.003
17:1551-1569	6mer	0.002
17:566-590	6mer	0.002
>ENST00000582106	ENSG00000265688(MAFG-AS1)	hsa-miR-939-3p	-21	0.765
17:1711-1733	8mer	0.016
17:695-721	7mer	0.005
17:403-423	7mer	0.004
17:1311-1337	7mer	0.003
17:1847-1874	6mer	0.002
>ENST00000582106	ENSG00000265688(MAFG-AS1)	hsa-miR-4755-3p	-21	0.764
17:1348-1362	7mer	0.007
17:9-29	6mer	0.005
17:342-366	7mer	0.004
17:135-149	8mer	0.003
17:878-904	8mer	0.003
17:23-39	6mer	0.003
17:34-54	7mer	0.002
17:1861-1884	6mer	0.002
17:682-698	6mer	0.001
>ENST00000582106	ENSG00000265688(MAFG-AS1)	hsa-miR-146b-3p	-21	0.762
17:1477-1501	7mer	0.012
17:1454-1469	7mer	0.007
17:1855-1875	6mer	0.004
17:144-170	6mer	0.003
17:1309-1327	6mer	0.003
17:206-230	6mer	0.001
>ENST00000582106	ENSG00000265688(MAFG-AS1)	hsa-miR-3156-3p	-21	0.76
17:1563-1579	8mer	0.01
17:1699-1715	7mer	0.007
17:1563-1569	6mer	0.003
17:576-590	6mer	0.002
17:1177-1195	6mer	0.002
17:1000-1018	6mer	0.002
17:1118-1136	6mer	0.002
17:1059-1077	6mer	0.001
>ENST00000582106	ENSG00000265688(MAFG-AS1)	hsa-miR-3663-5p	-21	0.757
17:1587-1610	8mer	0.029
>ENST00000583492	ENSG00000265688(MAFG-AS1)	hsa-miR-6825-5p	-21	0.755
17:90-114	9mer	0.022
17:116-136	7mer	0.007
>ENST00000582106	ENSG00000265688(MAFG-AS1)	hsa-miR-5006-5p	-21	0.752
17:15-31	9mer	0.016
17:1474-1486	7mer	0.007
17:353-368	7mer	0.004
17:631-653	6mer	0.002
>ENST00000583492	ENSG00000265688(MAFG-AS1)	hsa-miR-6799-5p	-21	0.749
17:86-113	9mer	0.016
17:117-135	8mer+mismatch	0.004
17:628-643	6mer	0.003
17:392-409	8mer	0.002
17:379-396	6mer	0.002
17:464-480	6mer	0.001
17:405-421	6mer	0.001
>ENST00000583492	ENSG00000265688(MAFG-AS1)	hsa-miR-1202	-21	0.746
17:785-795	8mer	0.016
17:59-82	8mer	0.012
>ENST00000582106	ENSG00000265688(MAFG-AS1)	hsa-miR-211-3p	-21	0.745
17:716-734	8mer	0.017
17:12-27	7mer	0.004
17:1278-1304	6mer	0.003
17:887-909	6mer	0.002
17:244-271	6mer	0.002
17:1297-1312	6mer	0.001
>ENST00000582106	ENSG00000265688(MAFG-AS1)	hsa-miR-612	-21	0.743
17:1712-1731	7mer	0.006
17:1541-1559	6mer	0.005
17:475-493	8mer	0.005
17:1669-1692	6mer	0.005
17:399-422	8mer	0.003
17:90-111	6mer	0.002
17:697-720	6mer	0.002
>ENST00000583492	ENSG00000265688(MAFG-AS1)	hsa-miR-204-3p	-21	0.739
17:848-869	7mer	0.023
17:770-790	6mer	0.005
>ENST00000582106	ENSG00000265688(MAFG-AS1)	hsa-miR-765	-21	0.738
17:537-557	9mer	0.014
17:1855-1871	8mer	0.005
17:1849-1867	7mer	0.003
17:905-931	6mer	0.002
17:946-967	7mer	0.001
17:1200-1223	6mer	0.001
17:1148-1169	6mer	0.001
17:1089-1110	6mer	0.001
17:971-992	6mer	0
>ENST00000583492	ENSG00000265688(MAFG-AS1)	hsa-miR-3156-3p	-21	0.738
17:873-889	8mer	0.015
17:873-879	6mer	0.005
17:428-446	6mer	0.004
17:487-505	6mer	0.003
>ENST00000583492	ENSG00000265688(MAFG-AS1)	hsa-miR-4254	-21	0.736
17:622-632	8mer	0.016
17:341-361	7mer	0.012
>ENST00000582106	ENSG00000265688(MAFG-AS1)	hsa-miR-6754-5p	-21	0.735
17:1290-1313	8mer	0.011
17:717-735	7mer	0.008
17:891-909	7mer	0.005
17:9-28	7mer	0.003
17:1315-1336	8mer+mismatch	0.001
>ENST00000582106	ENSG00000265688(MAFG-AS1)	hsa-miR-3944-5p	-21	0.734
17:1385-1410	7mer	0.014
17:982-1007	7mer	0.003
17:1764-1771	6mer	0.003
17:1101-1125	7mer	0.003
17:647-666	6mer	0.002
17:904-926	6mer	0.002
>ENST00000583492	ENSG00000265688(MAFG-AS1)	hsa-miR-6506-5p	-21	0.732
17:845-868	7mer	0.025
17:628-645	6mer	0.002
>ENST00000583492	ENSG00000265688(MAFG-AS1)	hsa-miR-6851-5p	-21	0.727
17:85-111	7mer	0.011
17:340-358	7mer	0.008
17:369-393	6mer	0.003
17:519-534	6mer	0.002
17:382-408	7mer	0.002
>ENST00000583492	ENSG00000265688(MAFG-AS1)	hsa-miR-150-5p	-21	0.726
17:870-890	7mer	0.015
17:870-880	7mer	0.011
>ENST00000582106	ENSG00000265688(MAFG-AS1)	hsa-miR-6852-5p	-21	0.725
17:1709-1733	7mer	0.008
17:1314-1337	7mer	0.003
17:986-1001	7mer	0.003
17:1163-1178	7mer	0.003
17:700-721	6mer	0.002
17:150-169	6mer	0.002
17:1343-1367	6mer	0.002
17:1104-1119	7mer	0.002
17:405-423	6mer	0.002
17:1038-1060	7mer	0.002
>ENST00000583492	ENSG00000265688(MAFG-AS1)	hsa-miR-6836-3p	-21	0.722
17:869-882	8mer	0.026
>ENST00000582106	ENSG00000265688(MAFG-AS1)	hsa-miR-1291	-21	0.72
17:1854-1876	7mer	0.008
17:148-171	7mer	0.006
17:1480-1500	8mer+mismatch	0.005
17:1311-1328	7mer	0.005
17:743-763	6mer	0.002
>ENST00000583492	ENSG00000265688(MAFG-AS1)	hsa-miR-3116	-21	0.719
17:610-633	8mer	0.018
17:387-403	6mer	0.003
17:478-489	6mer	0.002
17:436-462	6mer	0.002
17:419-430	6mer	0.001
>ENST00000583492	ENSG00000265688(MAFG-AS1)	hsa-miR-6890-3p	-21	0.717
17:872-886	9mer	0.02
17:155-172	6mer	0.004
17:828-848	6mer	0.002
>ENST00000583492	ENSG00000265688(MAFG-AS1)	hsa-miR-4727-5p	-21	0.715
17:748-766	7mer	0.023
17:530-547	6mer	0.003
>ENST00000583492	ENSG00000265688(MAFG-AS1)	hsa-miR-188-3p	-21	0.714
17:865-889	7mer	0.008
17:486-505	7mer	0.007
17:427-446	7mer	0.007
17:861-879	6mer	0.004
>ENST00000582106	ENSG00000265688(MAFG-AS1)	hsa-miR-4486	-21	0.714
17:1538-1559	6mer	0.005
17:1674-1692	6mer	0.005
17:1717-1731	6mer	0.003
17:478-493	7mer	0.003
17:1463-1480	6mer	0.003
17:357-376	6mer	0.002
17:93-111	6mer	0.002
17:698-720	6mer	0.002
17:411-422	6mer	0.001
>ENST00000582106	ENSG00000265688(MAFG-AS1)	hsa-miR-6506-5p	-21	0.714
17:1535-1558	7mer	0.017
17:1666-1691	6mer	0.004
17:351-375	6mer	0.002
17:1318-1335	6mer	0.001
>ENST00000582106	ENSG00000265688(MAFG-AS1)	hsa-miR-4292	-21	0.711
17:1709-1734	9mer	0.016
17:1323-1337	7mer	0.004
17:1349-1368	7mer	0.002
17:1851-1874	6mer	0.002
17:1410-1427	6mer	0.002
>ENST00000583492	ENSG00000265688(MAFG-AS1)	hsa-miR-5580-5p	-21	0.711
17:22-43	7mer	0.011
17:866-870	6mer	0.008
17:116-130	6mer	0.006
>ENST00000582106	ENSG00000265688(MAFG-AS1)	hsa-miR-6892-3p	-21	0.709
17:784-810	8mer	0.025
>ENST00000582106	ENSG00000265688(MAFG-AS1)	hsa-miR-578	-21	0.708
17:1619-1643	7mer	0.02
17:1491-1515	6mer	0.005
>ENST00000583492	ENSG00000265688(MAFG-AS1)	hsa-miR-6071	-21	0.707
17:533-546	8mer	0.013
17:28-46	7mer	0.008
17:742-767	6mer	0.004
>ENST00000583492	ENSG00000265688(MAFG-AS1)	hsa-miR-4267	-21	0.705
17:375-385	7mer	0.012
17:784-802	7mer	0.008
17:784-793	6mer	0.005
>ENST00000583492	ENSG00000265688(MAFG-AS1)	hsa-miR-939-5p	-21	0.702
17:110-136	9mer	0.017
17:89-114	7mer	0.008
>ENST00000582106	ENSG00000265688(MAFG-AS1)	hsa-miR-4298	-21	0.701
17:1674-1691	8mer	0.017
17:1538-1558	6mer	0.004
17:351-375	6mer	0.003
17:1314-1335	6mer	0.002
>ENST00000582106	ENSG00000265688(MAFG-AS1)	hsa-miR-6778-3p	-21	0.701
17:1562-1572	8mer	0.025
>ENST00000583492	ENSG00000265688(MAFG-AS1)	hsa-miR-4757-5p	-21	0.7
17:228-254	7mer	0.011
17:178-203	6mer	0.009
17:302-328	7mer	0.004
>ENST00000583492	ENSG00000265688(MAFG-AS1)	hsa-miR-194-3p	-21	0.7
17:674-693	8mer	0.02
17:68-85	6mer	0.004
>ENST00000583492	ENSG00000265688(MAFG-AS1)	hsa-miR-3972	-21	0.698
17:61-81	8mer	0.013
17:773-795	7mer	0.012
>ENST00000583492	ENSG00000265688(MAFG-AS1)	hsa-miR-5588-3p	-21	0.697
17:489-507	8mer	0.014
17:430-448	8mer	0.01
>ENST00000582106	ENSG00000265688(MAFG-AS1)	hsa-miR-3689d	-21	0.696
17:666-684	8mer	0.009
17:909-930	7mer	0.004
17:1320-1333	6mer	0.003
17:974-981	8mer	0.002
17:1074-1099	8mer	0.001
17:1013-1040	8mer	0.001
17:1146-1170	6mer	0.001
17:947-968	6mer	0.001
17:1087-1111	6mer	0.001
17:969-993	6mer	0.001
>ENST00000582106	ENSG00000265688(MAFG-AS1)	hsa-miR-6791-5p	-21	0.695
17:1709-1734	8mer	0.016
17:1317-1337	7mer	0.004
17:1343-1368	7mer	0.002
17:1400-1427	6mer	0.002
17:144-169	6mer	0.001
>ENST00000582106	ENSG00000265688(MAFG-AS1)	hsa-miR-5589-5p	-21	0.694
17:1533-1559	6mer	0.006
17:1674-1693	6mer	0.004
17:91-112	7mer	0.003
17:1766-1778	6mer	0.003
17:1285-1300	6mer	0.002
17:358-376	6mer	0.002
17:472-493	6mer	0.002
17:662-688	6mer	0.001
17:1463-1481	6mer	0.001
>ENST00000582106	ENSG00000265688(MAFG-AS1)	hsa-miR-4732-3p	-21	0.691
17:1478-1500	8mer	0.024
>ENST00000583492	ENSG00000265688(MAFG-AS1)	hsa-miR-3664-3p	-21	0.691
17:524-538	9mer	0.021
17:220-234	6mer	0.003
>ENST00000582106	ENSG00000265688(MAFG-AS1)	hsa-miR-2116-3p	-21	0.691
17:1700-1716	7mer	0.007
17:1559-1570	7mer	0.006
17:1566-1579	6mer	0.003
17:1246-1260	6mer	0.003
17:568-591	7mer	0.002
17:499-517	6mer	0.002
17:1246-1264	6mer	0.001
>ENST00000582106	ENSG00000265688(MAFG-AS1)	hsa-miR-3135b	-21	0.69
17:1762-1778	8mer	0.017
17:1275-1300	7mer	0.004
17:92-112	6mer	0.002
17:191-210	6mer	0.002
>ENST00000583492	ENSG00000265688(MAFG-AS1)	hsa-miR-579-5p	-21	0.69
17:196-216	8mer	0.024
>ENST00000583492	ENSG00000265688(MAFG-AS1)	hsa-miR-642a-5p	-21	0.69
17:218-239	8mer	0.024
>ENST00000583492	ENSG00000265688(MAFG-AS1)	hsa-miR-1343-5p	-21	0.689
17:112-136	8mer	0.015
17:87-114	7mer	0.009
>ENST00000583492	ENSG00000265688(MAFG-AS1)	hsa-miR-7160-3p	-21	0.689
17:621-640	8mer	0.02
17:601-613	6mer	0.003
>ENST00000583492	ENSG00000265688(MAFG-AS1)	hsa-miR-4441	-21	0.689
17:314-338	8mer	0.011
17:602-622	7mer	0.008
17:151-162	6mer	0.004
>ENST00000582106	ENSG00000265688(MAFG-AS1)	hsa-miR-194-3p	-21	0.689
17:1364-1383	8mer	0.015
17:1745-1768	6mer	0.004
17:640-657	6mer	0.002
17:28-37	6mer	0.002
>ENST00000583492	ENSG00000265688(MAFG-AS1)	hsa-miR-1291	-21	0.686
17:621-638	7mer	0.011
17:790-810	8mer+mismatch	0.009
17:171-191	6mer	0.004
>ENST00000583492	ENSG00000265688(MAFG-AS1)	hsa-miR-24-3p	-21	0.686
17:691-709	7mer	0.014
17:884-902	6mer	0.005
17:431-453	8mer	0.005
>ENST00000582106	ENSG00000265688(MAFG-AS1)	hsa-miR-6752-3p	-21	0.682
17:1445-1467	8mer	0.017
17:1311-1326	7mer	0.006
>ENST00000582106	ENSG00000265688(MAFG-AS1)	hsa-miR-143-5p	-21	0.68
17:1746-1772	8mer	0.007
17:1387-1409	6mer	0.005
17:907-927	7mer	0.004
17:981-1008	7mer	0.003
17:1111-1126	7mer	0.002
17:639-665	6mer	0.002
>ENST00000582106	ENSG00000265688(MAFG-AS1)	hsa-miR-6071	-21	0.679
17:1223-1236	8mer	0.008
17:600-618	7mer	0.005
17:391-407	8mer	0.004
17:1827-1836	6mer	0.004
17:1432-1457	6mer	0.003
>ENST00000583492	ENSG00000265688(MAFG-AS1)	hsa-miR-4797-3p	-21	0.678
17:219-234	8mer	0.019
17:525-538	6mer	0.003
17:427-451	6mer	0.001
>ENST00000583492	ENSG00000265688(MAFG-AS1)	hsa-miR-345-3p	-21	0.677
17:783-810	7mer	0.014
17:759-778	6mer	0.005
17:617-637	6mer	0.004
>ENST00000583492	ENSG00000265688(MAFG-AS1)	hsa-miR-514a-5p	-21	0.674
17:684-702	8mer	0.023
>ENST00000583492	ENSG00000265688(MAFG-AS1)	hsa-miR-6817-5p	-21	0.671
17:739-766	7mer	0.022
>ENST00000583492	ENSG00000265688(MAFG-AS1)	hsa-miR-3130-3p	-21	0.671
17:159-178	8mer	0.019
17:834-846	7mer	0.004
>ENST00000583492	ENSG00000265688(MAFG-AS1)	hsa-miR-4713-5p	-21	0.669
17:875-891	9mer	0.022
>ENST00000583492	ENSG00000265688(MAFG-AS1)	hsa-miR-4683	-21	0.668
17:284-298	7mer	0.013
17:83-103	7mer	0.009
>ENST00000582106	ENSG00000265688(MAFG-AS1)	hsa-miR-4645-5p	-21	0.668
17:1777-1781	6mer	0.004
17:1306-1314	6mer	0.003
17:1342-1361	7mer	0.003
17:352-365	6mer	0.002
17:140-147	6mer	0.002
17:32-53	6mer	0.002
17:64-76	6mer	0.002
17:887-902	6mer	0.002
17:251-264	6mer	0.002
>ENST00000582106	ENSG00000265688(MAFG-AS1)	hsa-miR-324-3p	-21	0.665
17:1829-1834	7mer	0.018
17:1844-1860	6mer	0.002
17:206-231	6mer	0.002
>ENST00000582106	ENSG00000265688(MAFG-AS1)	hsa-miR-3180	-21	0.665
17:224-247	6mer	0.005
17:978-999	8mer	0.003
17:1459-1478	6mer	0.003
17:1159-1176	8mer	0.003
17:583-609	7mer	0.003
17:1100-1117	8mer	0.003
17:1037-1058	8mer	0.002
>ENST00000582106	ENSG00000265688(MAFG-AS1)	hsa-miR-4441	-21	0.663
17:886-910	8mer	0.007
17:1292-1312	7mer	0.006
17:723-734	6mer	0.003
17:164-176	6mer	0.003
17:421-432	8mer+wobble	0.002
17:12-27	6mer	0.002
>ENST00000582106	ENSG00000265688(MAFG-AS1)	hsa-miR-3157-3p	-21	0.662
17:1829-1834	6mer	0.007
17:1479-1501	6mer	0.004
17:208-231	9mer	0.004
17:1447-1465	6mer	0.003
17:1837-1860	6mer	0.003
17:1447-1469	6mer	0.002
>ENST00000583492	ENSG00000265688(MAFG-AS1)	hsa-miR-6504-5p	-21	0.66
17:534-557	8mer	0.022
>ENST00000583492	ENSG00000265688(MAFG-AS1)	hsa-miR-6827-5p	-21	0.659
17:313-335	8mer	0.016
17:116-134	6mer	0.003
17:621-644	6mer	0.002
>ENST00000582106	ENSG00000265688(MAFG-AS1)	hsa-miR-597-3p	-21	0.658
17:1777-1794	8mer	0.02
17:766-785	6mer	0.001
>ENST00000583492	ENSG00000265688(MAFG-AS1)	hsa-miR-3150a-3p	-21	0.657
17:98-115	8mer	0.009
17:113-136	7mer	0.005
17:764-789	6mer	0.003
17:469-487	6mer	0.002
17:405-428	6mer	0.001
>ENST00000582106	ENSG00000265688(MAFG-AS1)	hsa-miR-3192-5p	-21	0.657
17:1533-1558	6mer	0.005
17:358-375	7mer	0.005
17:1666-1691	6mer	0.004
17:1317-1336	8mer	0.003
17:1264-1284	6mer	0.002
17:426-449	6mer	0.001
>ENST00000583492	ENSG00000265688(MAFG-AS1)	hsa-miR-6816-5p	-21	0.657
17:410-427	9mer	0.007
17:470-486	9mer	0.006
17:16-37	7mer	0.005
17:763-788	6mer	0.004
>ENST00000582106	ENSG00000265688(MAFG-AS1)	hsa-miR-6775-3p	-21	0.654
17:1854-1876	7mer	0.007
17:1311-1328	7mer	0.006
17:145-171	7mer	0.006
17:1461-1475	6mer	0.001
17:55-74	6mer	0.001
>ENST00000583492	ENSG00000265688(MAFG-AS1)	hsa-miR-3064-5p	-21	0.654
17:543-557	8mer	0.021
>ENST00000582106	ENSG00000265688(MAFG-AS1)	hsa-miR-7155-3p	-21	0.653
17:744-763	9mer	0.021
>ENST00000583492	ENSG00000265688(MAFG-AS1)	hsa-miR-133a-5p	-21	0.652
17:905-920	6mer	0.011
17:118-131	6mer	0.005
17:769-791	6mer	0.005
>ENST00000583492	ENSG00000265688(MAFG-AS1)	hsa-miR-219b-3p	-21	0.651
17:798-815	7mer	0.021
>ENST00000582106	ENSG00000265688(MAFG-AS1)	hsa-miR-7113-5p	-21	0.651
17:721-736	8mer	0.011
17:9-28	7mer	0.005
17:1295-1313	8mer	0.005
>ENST00000583492	ENSG00000265688(MAFG-AS1)	hsa-miR-3180	-21	0.651
17:406-427	8mer	0.006
17:469-486	8mer	0.005
17:11-37	7mer	0.005
17:769-788	6mer	0.004
>ENST00000583492	ENSG00000265688(MAFG-AS1)	hsa-miR-3919	-21	0.648
17:328-352	8mer	0.01
17:71-91	6mer	0.006
17:646-667	7mer	0.005
>ENST00000583492	ENSG00000265688(MAFG-AS1)	hsa-miR-6785-5p	-21	0.646
17:619-644	9mer	0.013
17:89-112	6mer	0.004
17:373-397	6mer	0.001
17:456-481	6mer	0.001
17:403-422	6mer	0.001
17:388-410	6mer	0.001
>ENST00000583492	ENSG00000265688(MAFG-AS1)	hsa-miR-647	-21	0.646
17:163-181	8mer	0.017
17:538-555	6mer	0.003
>ENST00000582106	ENSG00000265688(MAFG-AS1)	hsa-miR-4254	-21	0.644
17:1312-1322	8mer	0.009
17:1851-1873	7mer	0.005
17:913-933	7mer	0.004
17:146-168	6mer	0.002
>ENST00000582106	ENSG00000265688(MAFG-AS1)	hsa-miR-6816-5p	-21	0.644
17:982-999	9mer	0.004
17:1160-1176	9mer	0.003
17:229-247	6mer	0.003
17:1090-1117	9mer	0.003
17:588-609	7mer	0.003
17:1453-1478	6mer	0.003
17:1041-1058	9mer	0.002
>ENST00000582106	ENSG00000265688(MAFG-AS1)	hsa-miR-1202	-21	0.643
17:1475-1485	8mer	0.01
17:631-654	8mer	0.007
17:9-30	6mer	0.003
>ENST00000582106	ENSG00000265688(MAFG-AS1)	hsa-miR-6783-3p	-21	0.642
17:1571-1598	8mer+wobble	0.01
17:709-722	8mer	0.009
17:922-935	6mer	0.002
>ENST00000582106	ENSG00000265688(MAFG-AS1)	hsa-miR-3972	-21	0.642
17:633-653	8mer	0.007
17:1463-1485	7mer	0.007
17:9-30	6mer	0.004
17:345-368	7mer	0.001
>ENST00000582106	ENSG00000265688(MAFG-AS1)	hsa-miR-4300	-21	0.641
17:367-374	9mer	0.01
17:696-706	8mer	0.006
17:1313-1334	6mer	0.002
17:883-907	6mer	0.002
>ENST00000583492	ENSG00000265688(MAFG-AS1)	hsa-miR-2116-3p	-21	0.64
17:869-880	7mer	0.009
17:876-889	6mer	0.005
17:556-570	6mer	0.004
17:556-574	6mer	0.002
>ENST00000583492	ENSG00000265688(MAFG-AS1)	hsa-miR-4270	-21	0.64
17:604-623	7mer	0.008
17:318-337	7mer	0.006
17:144-163	6mer	0.005
>ENST00000582106	ENSG00000265688(MAFG-AS1)	hsa-miR-4784	-21	0.639
17:653-678	9mer	0.01
17:534-555	7mer	0.007
17:1849-1866	6mer	0.002
17:946-966	6mer	0.001
>ENST00000583492	ENSG00000265688(MAFG-AS1)	hsa-miR-6843-3p	-21	0.637
17:901-918	7mer	0.02
>ENST00000582106	ENSG00000265688(MAFG-AS1)	hsa-miR-4727-5p	-21	0.637
17:1438-1456	7mer	0.011
17:1827-1835	6mer	0.006
17:1220-1237	6mer	0.002
17:257-279	6mer	0.001
>ENST00000583492	ENSG00000265688(MAFG-AS1)	hsa-miR-4784	-21	0.636
17:81-106	9mer	0.017
17:374-394	6mer	0.003
>ENST00000583492	ENSG00000265688(MAFG-AS1)	hsa-miR-6852-5p	-21	0.636
17:473-488	7mer	0.005
17:624-647	7mer	0.004
17:414-429	7mer	0.004
17:653-677	6mer	0.003
17:128-149	6mer	0.003
>ENST00000582106	ENSG00000265688(MAFG-AS1)	hsa-miR-150-5p	-21	0.636
17:1560-1580	7mer	0.009
17:1560-1570	7mer	0.007
17:442-466	6mer	0.002
17:575-591	6mer	0.002
>ENST00000583492	ENSG00000265688(MAFG-AS1)	hsa-miR-6848-3p	-21	0.636
17:905-918	7mer	0.02
>ENST00000583492	ENSG00000265688(MAFG-AS1)	hsa-miR-143-5p	-21	0.636
17:697-719	6mer	0.007
17:335-355	7mer	0.006
17:67-93	6mer	0.004
17:409-436	7mer	0.003
>ENST00000583492	ENSG00000265688(MAFG-AS1)	hsa-miR-4436a	-21	0.635
17:696-717	9mer	0.02
>ENST00000582106	ENSG00000265688(MAFG-AS1)	hsa-miR-331-3p	-21	0.634
17:1715-1734	8mer	0.008
17:1354-1369	8mer	0.007
17:363-386	6mer	0.002
17:1412-1427	6mer	0.002
>ENST00000582106	ENSG00000265688(MAFG-AS1)	hsa-miR-18a-3p	-21	0.634
17:206-231	8mer	0.008
17:1808-1834	6mer	0.006
17:1444-1465	6mer	0.003
17:1834-1860	6mer	0.003
>ENST00000582106	ENSG00000265688(MAFG-AS1)	hsa-miR-22-3p	-21	0.633
17:347-370	8mer	0.007
17:562-576	6mer	0.005
17:1848-1862	7mer	0.004
17:1178-1187	7mer	0.002
17:1060-1069	7mer	0.002
>ENST00000583492	ENSG00000265688(MAFG-AS1)	hsa-miR-512-3p	-21	0.632
17:850-873	8mer	0.02
>ENST00000583492	ENSG00000265688(MAFG-AS1)	hsa-miR-5579-5p	-21	0.632
17:707-729	8mer	0.02
>ENST00000582106	ENSG00000265688(MAFG-AS1)	hsa-miR-3136-3p	-21	0.632
17:737-763	8mer	0.018
17:249-267	6mer	0.002
>ENST00000583492	ENSG00000265688(MAFG-AS1)	hsa-miR-3190-5p	-21	0.632
17:650-676	8mer	0.009
17:116-129	8mer	0.007
17:538-557	6mer	0.003
>ENST00000582106	ENSG00000265688(MAFG-AS1)	hsa-miR-6817-5p	-21	0.632
17:1429-1456	7mer	0.01
17:1831-1835	6mer	0.006
17:346-368	6mer	0.002
17:257-279	6mer	0.001
>ENST00000582106	ENSG00000265688(MAFG-AS1)	hsa-miR-4293	-21	0.631
17:1723-1744	7mer	0.006
17:1681-1706	6mer	0.005
17:218-234	6mer	0.002
17:988-1004	7mer	0.002
17:1165-1181	7mer	0.001
17:1106-1122	7mer	0.001
17:1050-1063	7mer	0.001
>ENST00000582106	ENSG00000265688(MAFG-AS1)	hsa-miR-5588-3p	-21	0.631
17:1179-1197	8mer	0.009
17:1120-1138	8mer	0.004
17:1061-1079	8mer	0.004
17:1002-1020	8mer	0.002
>ENST00000582106	ENSG00000265688(MAFG-AS1)	hsa-miR-3116	-21	0.631
17:1300-1323	8mer	0.006
17:253-277	7mer	0.005
17:406-424	6mer	0.002
17:959-975	6mer	0.001
17:1168-1179	6mer	0.001
17:1126-1152	6mer	0.001
17:1109-1120	6mer	0.001
17:991-1002	6mer	0.001
17:1047-1061	6mer	0.001
17:1008-1034	6mer	0.001
17:1082-1093	6mer	0.001
>ENST00000582106	ENSG00000265688(MAFG-AS1)	hsa-miR-602	-21	0.631
17:517-541	8mer	0.019
>ENST00000582106	ENSG00000265688(MAFG-AS1)	hsa-miR-3150b-3p	-21	0.63
17:655-678	9mer	0.01
17:536-555	7mer	0.007
17:1844-1866	6mer	0.002
17:945-966	6mer	0.001
>ENST00000582106	ENSG00000265688(MAFG-AS1)	hsa-miR-3180-3p	-21	0.628
17:222-247	6mer	0.004
17:977-999	8mer	0.003
17:583-609	7mer	0.003
17:1452-1478	6mer	0.003
17:1150-1176	8mer	0.003
17:1095-1117	8mer	0.002
17:1036-1058	8mer	0.002
>ENST00000583492	ENSG00000265688(MAFG-AS1)	hsa-miR-4300	-21	0.627
17:124-134	8mer	0.013
17:311-335	6mer	0.004
17:623-644	6mer	0.003
>ENST00000583492	ENSG00000265688(MAFG-AS1)	hsa-miR-193a-5p	-21	0.627
17:496-520	7mer	0.017
17:662-689	6mer	0.002
>ENST00000583492	ENSG00000265688(MAFG-AS1)	hsa-miR-1321	-21	0.626
17:321-337	7mer	0.009
17:136-162	6mer	0.005
17:604-622	7mer	0.003
17:397-409	8mer+mismatch	0.002
>ENST00000583492	ENSG00000265688(MAFG-AS1)	hsa-miR-6763-5p	-21	0.626
17:101-115	8mer	0.008
17:110-136	7mer	0.005
17:774-789	6mer	0.004
17:465-487	6mer	0.001
17:406-428	6mer	0.001
>ENST00000582106	ENSG00000265688(MAFG-AS1)	hsa-miR-579-3p	-21	0.625
17:1813-1818	7mer	0.019
>ENST00000583492	ENSG00000265688(MAFG-AS1)	hsa-miR-6776-5p	-21	0.625
17:580-594	8mer	0.019
>ENST00000583492	ENSG00000265688(MAFG-AS1)	hsa-miR-4284	-21	0.624
17:884-903	7mer	0.006
17:692-710	6mer	0.005
17:142-146	6mer	0.005
17:442-454	7mer	0.003
>ENST00000583492	ENSG00000265688(MAFG-AS1)	hsa-miR-6514-3p	-21	0.624
17:621-634	7mer	0.008
17:874-883	6mer	0.007
17:437-462	6mer	0.002
17:382-403	6mer	0.002
>ENST00000582106	ENSG00000265688(MAFG-AS1)	hsa-miR-153-5p	-21	0.624
17:1797-1817	7mer	0.019
>ENST00000583492	ENSG00000265688(MAFG-AS1)	hsa-miR-4755-3p	-21	0.623
17:658-672	7mer	0.011
17:306-332	8mer	0.005
17:110-126	6mer	0.003
>ENST00000582106	ENSG00000265688(MAFG-AS1)	hsa-miR-6840-3p	-21	0.623
17:1762-1783	7mer	0.007
17:566-588	7mer	0.005
17:1657-1665	6mer	0.005
17:61-78	7mer	0.002
17:243-266	7mer	0.001
>ENST00000583492	ENSG00000265688(MAFG-AS1)	hsa-miR-6791-3p	-21	0.623
17:856-882	7mer	0.019
>ENST00000583492	ENSG00000265688(MAFG-AS1)	hsa-miR-3180-3p	-21	0.622
17:405-427	8mer	0.005
17:460-486	8mer	0.005
17:11-37	7mer	0.005
17:762-788	6mer	0.004
>ENST00000583492	ENSG00000265688(MAFG-AS1)	hsa-miR-6829-3p	-21	0.621
17:870-882	7mer	0.019
>ENST00000583492	ENSG00000265688(MAFG-AS1)	hsa-miR-3150b-3p	-21	0.62
17:83-106	9mer	0.016
17:373-394	6mer	0.003
>ENST00000582106	ENSG00000265688(MAFG-AS1)	hsa-miR-296-5p	-21	0.617
17:168-172	6mer	0.004
17:1311-1330	7mer	0.004
17:1851-1877	6mer	0.003
17:252-269	7mer	0.002
17:1453-1476	6mer	0.002
17:404-427	6mer	0.002
17:294-314	7mer	0.001
>ENST00000583492	ENSG00000265688(MAFG-AS1)	hsa-miR-4728-5p	-21	0.617
17:621-644	8mer	0.012
17:86-112	6mer	0.003
17:464-481	6mer	0.001
17:398-422	6mer	0.001
17:387-410	6mer	0.001
>ENST00000583492	ENSG00000265688(MAFG-AS1)	hsa-miR-147b	-21	0.616
17:267-289	9mer	0.018
>ENST00000583492	ENSG00000265688(MAFG-AS1)	hsa-miR-138-5p	-21	0.615
17:898-920	6mer	0.01
17:117-131	6mer	0.005
17:770-791	6mer	0.003
>ENST00000583492	ENSG00000265688(MAFG-AS1)	hsa-miR-769-3p	-21	0.613
17:852-868	7mer	0.013
17:125-148	8mer+mismatch	0.003
17:620-645	6mer	0.002
>ENST00000582106	ENSG00000265688(MAFG-AS1)	hsa-miR-4308	-21	0.612
17:1850-1874	8mer	0.008
17:164-169	7mer	0.003
17:1712-1734	6mer	0.003
17:1320-1337	6mer	0.002
17:1363-1368	6mer	0.002
>ENST00000582106	ENSG00000265688(MAFG-AS1)	hsa-miR-6890-3p	-21	0.612
17:1562-1576	9mer	0.012
17:1723-1749	6mer	0.003
17:727-744	6mer	0.003
17:1518-1538	6mer	0.001
>ENST00000582106	ENSG00000265688(MAFG-AS1)	hsa-miR-744-5p	-21	0.611
17:585-610	7mer	0.004
17:301-318	7mer	0.004
17:1130-1148	9mer	0.004
17:1071-1089	9mer	0.003
17:379-395	6mer	0.001
17:1012-1030	7mer	0.001
17:953-971	6mer	0.001
>ENST00000583492	ENSG00000265688(MAFG-AS1)	hsa-miR-4299	-21	0.61
17:189-208	6mer	0.009
17:901-920	6mer	0.009
>ENST00000583492	ENSG00000265688(MAFG-AS1)	hsa-miR-5589-5p	-21	0.61
17:843-869	6mer	0.009
17:595-610	6mer	0.003
17:90-116	6mer	0.003
17:773-791	6mer	0.002
>ENST00000583492	ENSG00000265688(MAFG-AS1)	hsa-miR-3912-5p	-21	0.608
17:715-733	7mer	0.007
17:642-654	7mer	0.007
17:143-166	6mer	0.004
>ENST00000583492	ENSG00000265688(MAFG-AS1)	hsa-miR-339-5p	-21	0.608
17:713-737	8mer	0.018
>ENST00000582106	ENSG00000265688(MAFG-AS1)	hsa-miR-5001-3p	-21	0.608
17:1809-1836	7mer	0.009
17:1435-1457	7mer	0.008
17:259-280	7mer	0.002
>ENST00000582106	ENSG00000265688(MAFG-AS1)	hsa-miR-6738-3p	-21	0.607
17:1825-1837	8mer	0.01
17:1433-1457	7mer	0.008
>ENST00000583492	ENSG00000265688(MAFG-AS1)	hsa-miR-4695-5p	-21	0.606
17:369-393	8mer	0.009
17:511-535	7mer	0.007
17:103-124	6mer	0.002
>ENST00000583492	ENSG00000265688(MAFG-AS1)	hsa-miR-4524a-3p	-21	0.606
17:830-853	7mer	0.018
>ENST00000582106	ENSG00000265688(MAFG-AS1)	hsa-miR-664b-3p	-21	0.606
17:1809-1818	7mer	0.018
>ENST00000582106	ENSG00000265688(MAFG-AS1)	hsa-miR-3678-3p	-21	0.604
17:646-664	7mer	0.005
17:907-925	7mer	0.005
17:1729-1747	6mer	0.004
17:112-127	6mer	0.002
17:1159-1184	6mer	0.001
17:1040-1066	6mer	0.001
>ENST00000582106	ENSG00000265688(MAFG-AS1)	hsa-miR-4487	-21	0.604
17:193-211	7mer	0.012
17:689-704	8mer	0.006
>ENST00000582106	ENSG00000265688(MAFG-AS1)	hsa-miR-4676-5p	-21	0.604
17:15-39	8mer	0.007
17:639-660	9mer	0.006
17:887-905	7mer	0.002
17:135-150	7mer	0.002
>ENST00000583492	ENSG00000265688(MAFG-AS1)	hsa-miR-766-3p	-21	0.604
17:778-804	8mer	0.018
>ENST00000582106	ENSG00000265688(MAFG-AS1)	hsa-miR-6829-3p	-21	0.603
17:1560-1572	7mer	0.011
17:1684-1704	7mer	0.006
>ENST00000583492	ENSG00000265688(MAFG-AS1)	hsa-miR-371b-3p	-21	0.602
17:735-750	7mer	0.008
17:851-873	6mer	0.006
17:65-83	6mer	0.002
17:440-465	7mer	0.001
>ENST00000583492	ENSG00000265688(MAFG-AS1)	hsa-miR-106a-5p	-21	0.601
17:856-874	8mer	0.017
>ENST00000583492	ENSG00000265688(MAFG-AS1)	hsa-miR-106b-5p	-21	0.601
17:849-875	8mer	0.017
>ENST00000583492	ENSG00000265688(MAFG-AS1)	hsa-miR-526b-3p	-21	0.601
17:856-874	8mer	0.017
>ENST00000582106	ENSG00000265688(MAFG-AS1)	hsa-miR-6791-3p	-21	0.6
17:1546-1572	7mer	0.011
17:1681-1704	7mer	0.006
>ENST00000583492	ENSG00000265688(MAFG-AS1)	hsa-miR-1270	-21	0.6
17:275-298	7mer	0.01
17:342-360	6mer	0.004
17:609-630	7mer	0.003
>ENST00000583492	ENSG00000265688(MAFG-AS1)	hsa-miR-20a-5p	-21	0.6
17:848-875	8mer	0.017
>ENST00000582106	ENSG00000265688(MAFG-AS1)	hsa-miR-4267	-21	0.6
17:947-957	7mer	0.007
17:1474-1492	7mer	0.004
17:1659-1664	6mer	0.004
17:1474-1483	6mer	0.003
>ENST00000583492	ENSG00000265688(MAFG-AS1)	hsa-miR-505-5p	-21	0.599
17:315-335	9mer	0.012
17:111-134	6mer	0.003
17:97-123	6mer	0.002
>ENST00000582106	ENSG00000265688(MAFG-AS1)	hsa-miR-6825-5p	-21	0.599
17:662-686	9mer	0.011
17:1079-1101	8mer	0.004
17:688-708	7mer	0.002
>ENST00000583492	ENSG00000265688(MAFG-AS1)	hsa-miR-3192-5p	-21	0.598
17:843-868	6mer	0.008
17:627-646	8mer	0.006
17:574-594	6mer	0.003
>ENST00000583492	ENSG00000265688(MAFG-AS1)	hsa-miR-6726-5p	-21	0.597
17:113-134	8mer	0.011
17:318-335	6mer	0.003
17:381-397	6mer	0.001
17:396-422	6mer	0.001
17:455-481	6mer	0.001
>ENST00000583492	ENSG00000265688(MAFG-AS1)	hsa-miR-3678-3p	-21	0.597
17:74-92	7mer	0.008
17:335-353	7mer	0.007
17:469-494	6mer	0.002
>ENST00000582106	ENSG00000265688(MAFG-AS1)	hsa-miR-4673	-21	0.596
17:1335-1361	8mer	0.006
17:1764-1782	6mer	0.002
17:348-365	6mer	0.002
17:715-736	6mer	0.002
17:126-147	6mer	0.001
17:35-53	6mer	0.001
17:55-77	6mer	0.001
17:884-902	6mer	0.001
17:245-265	6mer	0.001
>ENST00000582106	ENSG00000265688(MAFG-AS1)	hsa-miR-6799-5p	-21	0.596
17:658-685	9mer	0.009
17:1318-1333	6mer	0.002
17:689-707	8mer+mismatch	0.001
17:951-968	6mer	0.001
17:964-981	8mer	0.001
17:1082-1100	9mer	0.001
17:1020-1040	8mer	0.001
17:1154-1170	6mer	0.001
17:977-993	6mer	0
17:1095-1111	6mer	0
17:1036-1052	6mer	0
>ENST00000582106	ENSG00000265688(MAFG-AS1)	hsa-miR-1285-3p	-21	0.595
17:1715-1732	7mer	0.005
17:469-492	7mer	0.003
17:415-423	7mer	0.003
17:1263-1284	6mer	0.002
17:701-721	6mer	0.002
17:422-449	6mer	0.001
>ENST00000583492	ENSG00000265688(MAFG-AS1)	hsa-miR-148a-3p	-21	0.595
17:732-752	7mer	0.013
17:58-85	6mer	0.004
>ENST00000582106	ENSG00000265688(MAFG-AS1)	hsa-miR-7847-3p	-21	0.594
17:536-558	8mer	0.011
17:848-872	7mer	0.005
17:85-104	6mer	0.001
>ENST00000582106	ENSG00000265688(MAFG-AS1)	hsa-miR-3187-5p	-21	0.594
17:1705-1732	8mer	0.008
17:694-721	7mer	0.003
17:468-492	7mer	0.003
17:397-423	9mer	0.002
>ENST00000583492	ENSG00000265688(MAFG-AS1)	hsa-miR-574-5p	-21	0.594
17:269-292	8mer	0.017
>ENST00000583492	ENSG00000265688(MAFG-AS1)	hsa-miR-1227-5p	-21	0.594
17:774-788	7mer	0.011
17:113-137	6mer	0.003
17:467-486	6mer	0.002
17:405-427	6mer	0.002
>ENST00000582106	ENSG00000265688(MAFG-AS1)	hsa-miR-518c-5p	-21	0.593
17:1365-1391	7mer	0.006
17:1768-1791	6mer	0.004
17:1849-1874	8mer+wobble	0.003
17:427-450	6mer	0.003
17:593-619	6mer	0.001
>ENST00000582106	ENSG00000265688(MAFG-AS1)	hsa-miR-199b-5p	-21	0.593
17:26-37	8mer	0.012
17:642-657	6mer	0.002
17:1361-1383	6mer	0.002
>ENST00000582106	ENSG00000265688(MAFG-AS1)	hsa-miR-3689b-3p	-21	0.592
17:1318-1335	8mer	0.004
>ENST00000582106	ENSG00000265688(MAFG-AS1)	hsa-miR-3689c	-21	0.592
17:1318-1335	8mer	0.004
17:358-375	7mer	0.004
17:358-375	7mer	0.004
17:1534-1558	6mer	0.004
17:1534-1558	6mer	0.004
17:1666-1691	6mer	0.003
17:1666-1691	6mer	0.003
17:1086-1099	8mer+mismatch	0.001
17:1086-1099	8mer+mismatch	0.001
>ENST00000582106	ENSG00000265688(MAFG-AS1)	hsa-miR-6877-3p	-21	0.592
17:1692-1706	7mer	0.01
17:1729-1744	6mer	0.003
17:980-1004	6mer	0.001
17:1157-1181	6mer	0.001
17:1098-1122	6mer	0.001
17:1039-1063	6mer	0.001
>ENST00000582106	ENSG00000265688(MAFG-AS1)	hsa-miR-5189-5p	-21	0.592
17:1705-1732	8mer	0.008
17:468-492	7mer	0.003
17:1265-1284	6mer	0.002
17:409-423	7mer	0.002
17:694-721	6mer	0.001
>ENST00000582106	ENSG00000265688(MAFG-AS1)	hsa-miR-3928-3p	-21	0.591
17:1197-1223	9mer	0.006
17:1853-1870	6mer	0.003
17:542-556	6mer	0.003
17:1843-1867	6mer	0.002
17:945-967	6mer	0.001
17:1145-1169	6mer	0.001
17:1086-1110	6mer	0.001
17:968-992	6mer	0
>ENST00000583492	ENSG00000265688(MAFG-AS1)	hsa-miR-575	-21	0.591
17:77-88	8mer	0.013
17:318-333	7mer	0.004
>ENST00000582106	ENSG00000265688(MAFG-AS1)	hsa-miR-7160-3p	-21	0.591
17:1311-1330	8mer	0.008
17:255-270	8mer	0.006
17:1291-1303	6mer	0.003
>ENST00000582106	ENSG00000265688(MAFG-AS1)	hsa-miR-4763-5p	-21	0.59
17:208-233	8mer	0.006
17:1518-1527	7mer	0.004
17:1730-1742	6mer	0.003
17:1134-1151	6mer	0.001
17:952-974	6mer	0.001
17:1016-1033	6mer	0.001
17:1066-1092	6mer	0.001
>ENST00000583492	ENSG00000265688(MAFG-AS1)	hsa-miR-149-3p	-21	0.59
17:623-643	7mer	0.005
17:313-336	6mer	0.004
17:91-112	6mer	0.003
17:377-396	6mer	0.002
17:388-409	6mer	0.001
17:397-421	6mer	0.001
17:461-480	6mer	0.001
>ENST00000583492	ENSG00000265688(MAFG-AS1)	hsa-miR-371a-5p	-21	0.59
17:898-914	8mer	0.017
>ENST00000583492	ENSG00000265688(MAFG-AS1)	hsa-miR-328-3p	-21	0.59
17:171-191	6mer	0.006
17:115-129	6mer	0.006
17:649-675	6mer	0.004
>ENST00000583492	ENSG00000265688(MAFG-AS1)	hsa-miR-4701-5p	-21	0.589
17:115-129	6mer	0.007
17:170-192	6mer	0.005
17:670-675	6mer	0.005
>ENST00000583492	ENSG00000265688(MAFG-AS1)	hsa-miR-6505-5p	-21	0.588
17:798-818	7mer	0.013
17:244-267	6mer	0.003
>ENST00000582106	ENSG00000265688(MAFG-AS1)	hsa-miR-514a-5p	-21	0.587
17:1374-1392	8mer	0.016
>ENST00000582106	ENSG00000265688(MAFG-AS1)	hsa-miR-3155b	-21	0.587
17:1377-1401	7mer	0.004
17:1764-1781	7mer	0.004
17:1348-1361	6mer	0.002
17:346-365	6mer	0.002
17:114-137	7mer	0.002
17:245-264	6mer	0.001
17:129-147	6mer	0.001
>ENST00000582106	ENSG00000265688(MAFG-AS1)	hsa-miR-138-5p	-21	0.587
17:1588-1610	6mer	0.006
17:1668-1693	6mer	0.004
17:187-210	6mer	0.003
17:689-703	6mer	0.002
17:1460-1481	6mer	0.002
>ENST00000583492	ENSG00000265688(MAFG-AS1)	hsa-miR-7854-3p	-21	0.587
17:99-110	7mer	0.011
17:333-357	6mer	0.004
17:394-407	6mer	0.002
>ENST00000583492	ENSG00000265688(MAFG-AS1)	hsa-miR-5089-5p	-21	0.587
17:841-867	7mer	0.016
>ENST00000582106	ENSG00000265688(MAFG-AS1)	hsa-miR-4284	-21	0.587
17:1574-1593	7mer	0.004
17:1826-1844	6mer	0.003
17:1382-1400	6mer	0.003
17:1073-1085	7mer	0.002
17:714-718	6mer	0.002
17:1132-1144	7mer	0.001
>ENST00000582106	ENSG00000265688(MAFG-AS1)	hsa-miR-6514-3p	-21	0.586
17:1564-1573	6mer	0.004
17:1311-1324	7mer	0.004
17:257-278	7mer	0.004
17:1127-1152	6mer	0.001
17:954-975	6mer	0.001
17:1012-1034	6mer	0.001
17:1068-1093	6mer	0.001
>ENST00000583492	ENSG00000265688(MAFG-AS1)	hsa-miR-4437	-21	0.586
17:879-904	7mer	0.008
17:122-147	7mer	0.005
17:435-454	8mer	0.003
>ENST00000582106	ENSG00000265688(MAFG-AS1)	hsa-miR-3155a	-21	0.586
17:1377-1401	7mer	0.004
17:1764-1781	7mer	0.004
17:1337-1361	6mer	0.002
17:341-365	6mer	0.002
17:114-137	7mer	0.002
17:245-264	6mer	0.001
17:129-147	6mer	0.001
>ENST00000582106	ENSG00000265688(MAFG-AS1)	hsa-miR-147b	-21	0.585
17:839-861	9mer	0.014
17:1659-1679	6mer	0.003
>ENST00000583492	ENSG00000265688(MAFG-AS1)	hsa-miR-3692-5p	-21	0.585
17:525-545	6mer	0.01
17:26-44	7mer	0.006
>ENST00000583492	ENSG00000265688(MAFG-AS1)	hsa-miR-1273g-3p	-21	0.585
17:867-886	7mer	0.013
17:147-173	7mer	0.003
>ENST00000582106	ENSG00000265688(MAFG-AS1)	hsa-miR-4436a	-21	0.585
17:1386-1407	9mer	0.012
17:101-125	7mer	0.003
17:129-154	6mer	0.001
>ENST00000582106	ENSG00000265688(MAFG-AS1)	hsa-miR-6880-5p	-21	0.585
17:542-559	8mer	0.011
17:90-105	7mer	0.003
17:755-779	6mer	0.003
>ENST00000583492	ENSG00000265688(MAFG-AS1)	hsa-miR-3928-3p	-21	0.585
17:507-533	9mer	0.01
17:373-395	6mer	0.003
17:455-479	6mer	0.002
17:396-420	6mer	0.001
>ENST00000583492	ENSG00000265688(MAFG-AS1)	hsa-miR-1207-3p	-21	0.584
17:781-793	7mer	0.009
17:360-384	6mer	0.004
17:25-52	6mer	0.003
>ENST00000583492	ENSG00000265688(MAFG-AS1)	hsa-miR-484	-21	0.584
17:692-711	8mer	0.016
>ENST00000583492	ENSG00000265688(MAFG-AS1)	hsa-miR-519d-3p	-21	0.583
17:856-875	8mer	0.016
>ENST00000583492	ENSG00000265688(MAFG-AS1)	hsa-miR-4673	-21	0.583
17:645-671	8mer	0.01
17:143-164	6mer	0.004
17:312-330	6mer	0.002
>ENST00000583492	ENSG00000265688(MAFG-AS1)	hsa-miR-3974	-21	0.583
17:492-513	7mer	0.016
>ENST00000583492	ENSG00000265688(MAFG-AS1)	hsa-miR-4756-5p	-21	0.582
17:315-337	7mer	0.01
17:138-162	6mer	0.004
17:596-622	7mer	0.003
>ENST00000582106	ENSG00000265688(MAFG-AS1)	hsa-miR-30b-3p	-21	0.582
17:1536-1558	6mer	0.004
17:1313-1335	8mer	0.004
17:349-375	7mer	0.004
17:1672-1691	6mer	0.003
>ENST00000582106	ENSG00000265688(MAFG-AS1)	hsa-miR-339-3p	-21	0.582
17:265-286	8mer	0.016
>ENST00000583492	ENSG00000265688(MAFG-AS1)	hsa-miR-4770	-21	0.582
17:285-296	7mer	0.01
17:647-664	6mer	0.004
17:539-551	6mer	0.002
>ENST00000582106	ENSG00000265688(MAFG-AS1)	hsa-miR-7108-3p	-21	0.581
17:51-71	8mer	0.008
17:1839-1858	6mer	0.003
17:330-355	7mer	0.003
17:35-57	6mer	0.002
>ENST00000583492	ENSG00000265688(MAFG-AS1)	hsa-miR-4676-5p	-21	0.581
17:67-88	9mer	0.012
17:315-333	7mer	0.004
>ENST00000582106	ENSG00000265688(MAFG-AS1)	hsa-miR-3919	-21	0.581
17:900-924	8mer	0.007
17:643-663	6mer	0.003
17:1336-1357	7mer	0.003
17:217-238	6mer	0.003
>ENST00000582106	ENSG00000265688(MAFG-AS1)	hsa-miR-596	-21	0.581
17:1728-1743	7mer	0.008
17:210-234	8mer	0.006
17:1158-1180	6mer	0.001
17:980-1003	6mer	0.001
17:1099-1121	6mer	0.001
17:1039-1062	6mer	0
>ENST00000582106	ENSG00000265688(MAFG-AS1)	hsa-miR-6845-5p	-21	0.581
17:1463-1477	6mer	0.005
17:148-173	6mer	0.003
17:1002-1026	8mer	0.003
17:602-609	6mer	0.003
17:301-316	7mer	0.002
>ENST00000583492	ENSG00000265688(MAFG-AS1)	hsa-miR-7106-5p	-21	0.581
17:619-644	7mer	0.004
17:372-397	8mer	0.004
17:94-112	6mer	0.003
17:454-481	7mer	0.002
17:395-422	7mer	0.002
17:389-410	6mer	0.001
>ENST00000582106	ENSG00000265688(MAFG-AS1)	hsa-miR-6749-3p	-21	0.581
17:1703-1717	7mer	0.012
17:501-518	7mer	0.004
>ENST00000582106	ENSG00000265688(MAFG-AS1)	hsa-miR-6504-5p	-21	0.58
17:1224-1247	8mer	0.016
>ENST00000582106	ENSG00000265688(MAFG-AS1)	hsa-miR-4713-5p	-21	0.58
17:1565-1581	9mer	0.014
17:449-466	6mer	0.002
>ENST00000582106	ENSG00000265688(MAFG-AS1)	hsa-miR-199a-5p	-21	0.579
17:14-37	8mer	0.012
17:1361-1383	6mer	0.002
17:642-657	6mer	0.002
>ENST00000583492	ENSG00000265688(MAFG-AS1)	hsa-miR-20b-5p	-21	0.578
17:856-875	9mer	0.016
>ENST00000583492	ENSG00000265688(MAFG-AS1)	hsa-miR-17-5p	-21	0.578
17:856-875	9mer	0.016
>ENST00000583492	ENSG00000265688(MAFG-AS1)	hsa-miR-3170	-21	0.578
17:499-522	6mer	0.004
17:89-115	6mer	0.003
17:768-789	6mer	0.003
17:477-487	6mer	0.003
17:407-428	6mer	0.002
>ENST00000583492	ENSG00000265688(MAFG-AS1)	hsa-miR-1182	-21	0.578
17:926-940	7mer	0.016
>ENST00000583492	ENSG00000265688(MAFG-AS1)	hsa-miR-8089	-21	0.577
17:89-115	7mer	0.004
17:769-789	6mer	0.004
17:464-488	7mer	0.002
17:407-429	7mer	0.002
17:123-149	6mer	0.002
17:621-646	6mer	0.002
>ENST00000583492	ENSG00000265688(MAFG-AS1)	hsa-miR-93-5p	-21	0.577
17:856-875	9mer	0.016
>ENST00000583492	ENSG00000265688(MAFG-AS1)	hsa-miR-6817-3p	-21	0.577
17:38-48	7mer	0.01
17:226-250	6mer	0.004
17:226-252	6mer	0.002
>ENST00000583492	ENSG00000265688(MAFG-AS1)	hsa-miR-1273f	-21	0.577
17:653-665	7mer	0.006
17:279-297	7mer	0.005
17:81-103	6mer	0.005
>ENST00000582106	ENSG00000265688(MAFG-AS1)	hsa-miR-6836-3p	-21	0.577
17:1559-1572	8mer	0.016
>ENST00000583492	ENSG00000265688(MAFG-AS1)	hsa-miR-5000-3p	-21	0.576
17:696-716	7mer	0.011
17:521-536	6mer	0.005
>ENST00000582106	ENSG00000265688(MAFG-AS1)	hsa-miR-484	-21	0.576
17:1382-1401	8mer	0.01
17:1766-1781	6mer	0.004
17:116-137	7mer	0.002
>ENST00000582106	ENSG00000265688(MAFG-AS1)	hsa-miR-7515	-21	0.576
17:557-570	8mer	0.011
17:419-429	6mer	0.002
17:994-1012	6mer	0.001
17:1112-1130	6mer	0.001
>ENST00000582106	ENSG00000265688(MAFG-AS1)	hsa-miR-6851-3p	-21	0.575
17:145-171	6mer	0.004
17:1311-1328	6mer	0.003
17:1851-1876	6mer	0.003
17:1459-1475	7mer	0.003
17:741-763	6mer	0.002
>ENST00000583492	ENSG00000265688(MAFG-AS1)	hsa-miR-371a-3p	-21	0.575
17:851-873	6mer	0.006
17:727-750	6mer	0.005
17:445-465	7mer	0.002
17:65-83	6mer	0.002
>ENST00000583492	ENSG00000265688(MAFG-AS1)	hsa-miR-6851-3p	-21	0.575
17:621-638	6mer	0.007
17:769-785	7mer	0.005
17:169-191	6mer	0.004
>ENST00000582106	ENSG00000265688(MAFG-AS1)	hsa-miR-3064-5p	-21	0.575
17:1233-1247	8mer	0.016
>ENST00000582106	ENSG00000265688(MAFG-AS1)	hsa-miR-575	-21	0.575
17:649-660	8mer	0.007
17:24-39	7mer	0.005
17:890-905	7mer	0.002
17:135-150	7mer	0.002
>ENST00000582106	ENSG00000265688(MAFG-AS1)	hsa-miR-6851-5p	-21	0.575
17:657-683	7mer	0.006
17:912-930	7mer	0.004
17:1854-1868	6mer	0.002
17:1209-1224	6mer	0.001
17:941-965	6mer	0.001
17:954-980	7mer	0.001
17:1079-1098	7mer	0.001
17:1020-1039	7mer	0.001
>ENST00000583492	ENSG00000265688(MAFG-AS1)	hsa-miR-6846-3p	-21	0.573
17:730-740	8mer	0.016
>ENST00000583492	ENSG00000265688(MAFG-AS1)	hsa-miR-93-3p	-21	0.573
17:525-545	6mer	0.013
17:20-44	6mer	0.003
>ENST00000583492	ENSG00000265688(MAFG-AS1)	hsa-miR-4667-5p	-21	0.573
17:100-115	8mer	0.008
17:771-789	6mer	0.004
17:471-487	6mer	0.002
17:411-428	6mer	0.002
>ENST00000582106	ENSG00000265688(MAFG-AS1)	hsa-miR-3653-5p	-21	0.572
17:1691-1703	8mer	0.015
>ENST00000582106	ENSG00000265688(MAFG-AS1)	hsa-miR-3652	-21	0.572
17:1759-1778	8mer	0.007
17:1274-1300	7mer	0.005
17:1416-1434	6mer	0.002
17:99-112	6mer	0.002
>ENST00000583492	ENSG00000265688(MAFG-AS1)	hsa-miR-3194-5p	-21	0.572
17:55-80	7mer	0.008
17:783-794	6mer	0.005
17:108-127	6mer	0.002
>ENST00000582106	ENSG00000265688(MAFG-AS1)	hsa-miR-133a-5p	-21	0.571
17:1595-1610	6mer	0.006
17:1671-1693	6mer	0.004
17:1459-1481	6mer	0.003
17:690-703	6mer	0.002
>ENST00000582106	ENSG00000265688(MAFG-AS1)	hsa-miR-661	-21	0.571
17:254-277	7mer	0.004
17:1303-1323	7mer	0.004
17:398-424	7mer	0.002
17:1160-1179	7mer	0.002
17:982-1002	7mer	0.002
17:1101-1120	7mer	0.001
17:1041-1061	7mer	0.001
>ENST00000582106	ENSG00000265688(MAFG-AS1)	hsa-miR-767-5p	-21	0.571
17:1660-1676	7mer	0.008
17:733-748	7mer	0.006
17:1518-1535	6mer	0.001
>ENST00000582106	ENSG00000265688(MAFG-AS1)	hsa-miR-3934-5p	-21	0.571
17:1661-1682	8mer	0.014
17:1865-1883	6mer	0.002
>ENST00000582106	ENSG00000265688(MAFG-AS1)	hsa-miR-5580-5p	-21	0.571
17:1556-1560	6mer	0.005
17:594-615	7mer	0.005
17:356-377	6mer	0.002
17:688-702	6mer	0.002
>ENST00000583492	ENSG00000265688(MAFG-AS1)	hsa-miR-3196	-21	0.57
17:19-37	9mer	0.008
17:411-426	7mer	0.004
17:471-485	7mer	0.003
17:444-456	6mer	0.001
>ENST00000583492	ENSG00000265688(MAFG-AS1)	hsa-miR-143-3p	-21	0.57
17:281-296	7mer	0.01
17:646-664	6mer	0.003
17:538-551	6mer	0.002
>ENST00000583492	ENSG00000265688(MAFG-AS1)	hsa-miR-663b	-21	0.57
17:184-206	7mer	0.015
>ENST00000583492	ENSG00000265688(MAFG-AS1)	hsa-miR-4297	-21	0.569
17:865-882	8mer+wobble	0.015
>ENST00000582106	ENSG00000265688(MAFG-AS1)	hsa-miR-345-3p	-21	0.569
17:1473-1500	7mer	0.009
17:1449-1468	6mer	0.003
17:1307-1327	6mer	0.002
17:149-170	8mer+mismatch	0.001
>ENST00000583492	ENSG00000265688(MAFG-AS1)	hsa-miR-5006-5p	-21	0.569
17:784-796	7mer	0.011
17:59-81	6mer	0.004
>ENST00000582106	ENSG00000265688(MAFG-AS1)	hsa-miR-4707-3p	-21	0.569
17:1841-1858	7mer	0.008
17:46-72	8mer	0.008
>ENST00000582106	ENSG00000265688(MAFG-AS1)	hsa-miR-1182	-21	0.568
17:1616-1630	7mer	0.012
17:540-562	6mer	0.003
17:1028-1050	6mer	0
>ENST00000582106	ENSG00000265688(MAFG-AS1)	hsa-miR-769-3p	-21	0.568
17:1542-1558	7mer	0.009
17:1673-1691	6mer	0.003
17:697-720	8mer+mismatch	0.001
17:1310-1335	6mer	0.001
>ENST00000583492	ENSG00000265688(MAFG-AS1)	hsa-miR-661	-21	0.568
17:613-633	7mer	0.009
17:470-489	7mer	0.004
17:410-430	7mer	0.003
>ENST00000582106	ENSG00000265688(MAFG-AS1)	hsa-miR-662	-21	0.568
17:1692-1714	8mer	0.008
17:1562-1578	6mer	0.002
17:1178-1195	6mer	0.001
17:1002-1018	6mer	0.001
17:1120-1136	6mer	0.001
17:1060-1077	6mer	0.001
>ENST00000582106	ENSG00000265688(MAFG-AS1)	hsa-miR-6779-5p	-21	0.567
17:1535-1558	6mer	0.004
17:1676-1691	6mer	0.004
17:351-375	7mer	0.003
17:1318-1335	9mer	0.003
17:256-274	8mer+mismatch	0.002
>ENST00000583492	ENSG00000265688(MAFG-AS1)	hsa-miR-331-3p	-21	0.567
17:664-679	8mer	0.012
17:722-737	6mer	0.003
>ENST00000583492	ENSG00000265688(MAFG-AS1)	hsa-miR-186-3p	-21	0.567
17:865-877	7mer	0.012
17:750-773	6mer	0.003
>ENST00000583492	ENSG00000265688(MAFG-AS1)	hsa-miR-4769-3p	-21	0.566
17:745-766	7mer	0.015
>ENST00000582106	ENSG00000265688(MAFG-AS1)	hsa-miR-4769-3p	-21	0.566
17:1435-1456	7mer	0.008
17:1809-1835	6mer	0.004
17:254-279	6mer	0.002
17:349-368	6mer	0.001
>ENST00000582106	ENSG00000265688(MAFG-AS1)	hsa-miR-8077	-21	0.566
17:198-223	7mer	0.006
17:1228-1244	7mer	0.006
17:1412-1433	6mer	0.003
>ENST00000583492	ENSG00000265688(MAFG-AS1)	hsa-miR-744-5p	-21	0.566
17:13-38	7mer	0.008
17:440-458	9mer	0.006
17:381-399	6mer	0.001
>ENST00000582106	ENSG00000265688(MAFG-AS1)	hsa-miR-3689a-3p	-21	0.566
17:1535-1558	6mer	0.004
17:1309-1335	8mer	0.004
17:358-375	7mer	0.004
17:1666-1691	6mer	0.003
>ENST00000582106	ENSG00000265688(MAFG-AS1)	hsa-miR-1273h-5p	-21	0.566
17:1533-1558	6mer	0.004
17:1316-1335	8mer	0.004
17:359-375	7mer	0.004
17:1674-1691	6mer	0.003
>ENST00000582106	ENSG00000265688(MAFG-AS1)	hsa-miR-1908-5p	-21	0.566
17:138-162	7mer	0.004
17:373-396	8mer	0.004
17:594-611	7mer	0.002
17:293-308	6mer	0.001
17:976-996	6mer	0.001
17:1094-1114	6mer	0.001
17:1150-1173	6mer	0.001
17:1035-1055	6mer	0.001
>ENST00000583492	ENSG00000265688(MAFG-AS1)	hsa-miR-620	-21	0.566
17:290-298	7mer	0.011
17:616-629	6mer	0.004
>ENST00000582106	ENSG00000265688(MAFG-AS1)	hsa-miR-558	-21	0.565
17:1853-1863	7mer	0.005
17:355-371	7mer	0.005
17:196-212	6mer	0.005
>ENST00000583492	ENSG00000265688(MAFG-AS1)	hsa-miR-4659a-3p	-21	0.565
17:939-954	6mer	0.008
17:800-826	6mer	0.007
>ENST00000582106	ENSG00000265688(MAFG-AS1)	hsa-miR-4418	-21	0.565
17:1735-1749	8mer	0.009
17:1518-1538	7mer	0.003
17:1562-1575	6mer	0.002
>ENST00000583492	ENSG00000265688(MAFG-AS1)	hsa-miR-6769b-3p	-21	0.565
17:225-237	7mer	0.01
17:230-252	7mer	0.005
>ENST00000583492	ENSG00000265688(MAFG-AS1)	hsa-miR-4433a-5p	-21	0.564
17:486-506	7mer	0.008
17:427-447	7mer	0.007
>ENST00000582106	ENSG00000265688(MAFG-AS1)	hsa-miR-6724-5p	-21	0.564
17:1862-1878	7mer	0.006
17:1705-1731	6mer	0.004
17:814-828	6mer	0.002
17:693-720	6mer	0.001
17:468-492	6mer	0.001
17:396-422	6mer	0.001
>ENST00000583492	ENSG00000265688(MAFG-AS1)	hsa-miR-4645-5p	-21	0.563
17:652-671	7mer	0.006
17:616-624	6mer	0.006
17:315-330	6mer	0.003
>ENST00000582106	ENSG00000265688(MAFG-AS1)	hsa-miR-744-3p	-21	0.562
17:27-33	8mer	0.015
>ENST00000583492	ENSG00000265688(MAFG-AS1)	hsa-miR-4536-3p	-21	0.562
17:70-95	7mer	0.015
>ENST00000583492	ENSG00000265688(MAFG-AS1)	hsa-miR-6775-3p	-21	0.562
17:621-638	7mer	0.013
17:771-785	6mer	0.002
>ENST00000582106	ENSG00000265688(MAFG-AS1)	hsa-miR-6860	-21	0.562
17:1709-1731	7mer	0.008
17:467-492	7mer	0.003
17:400-422	8mer	0.003
17:702-720	6mer	0.001
>ENST00000583492	ENSG00000265688(MAFG-AS1)	hsa-miR-3157-3p	-21	0.562
17:789-811	6mer	0.007
17:757-775	6mer	0.004
17:757-779	6mer	0.004
>ENST00000582106	ENSG00000265688(MAFG-AS1)	hsa-miR-4433a-5p	-21	0.561
17:1176-1196	7mer	0.005
17:1117-1137	7mer	0.003
17:999-1019	7mer	0.003
17:1058-1078	7mer	0.003
17:339-359	6mer	0.001
>ENST00000583492	ENSG00000265688(MAFG-AS1)	hsa-miR-4659b-3p	-21	0.561
17:935-954	6mer	0.007
17:803-826	6mer	0.007
>ENST00000583492	ENSG00000265688(MAFG-AS1)	hsa-miR-4690-3p	-21	0.561
17:667-682	7mer	0.008
17:54-78	6mer	0.003
17:410-433	6mer	0.002
17:470-492	6mer	0.002
>ENST00000583492	ENSG00000265688(MAFG-AS1)	hsa-miR-6728-3p	-21	0.56
17:20-47	8mer	0.015
>ENST00000582106	ENSG00000265688(MAFG-AS1)	hsa-miR-660-3p	-21	0.56
17:1686-1703	7mer	0.013
17:1244-1265	6mer	0.001
>ENST00000583492	ENSG00000265688(MAFG-AS1)	hsa-miR-6747-3p	-21	0.56
17:621-636	7mer	0.008
17:757-777	6mer	0.004
17:823-836	6mer	0.003
>ENST00000583492	ENSG00000265688(MAFG-AS1)	hsa-miR-520h	-21	0.559
17:856-875	8mer	0.015
>ENST00000583492	ENSG00000265688(MAFG-AS1)	hsa-miR-659-3p	-21	0.559
17:800-823	7mer	0.015
>ENST00000583492	ENSG00000265688(MAFG-AS1)	hsa-miR-520g-3p	-21	0.559
17:856-875	8mer	0.015
>ENST00000582106	ENSG00000265688(MAFG-AS1)	hsa-miR-6726-5p	-21	0.558
17:685-706	8mer	0.005
17:352-373	8mer	0.005
17:890-907	6mer	0.002
17:1145-1171	6mer	0.001
17:953-969	6mer	0.001
17:1086-1112	6mer	0
17:1027-1053	6mer	0
17:968-994	6mer	0
>ENST00000582106	ENSG00000265688(MAFG-AS1)	hsa-miR-6827-5p	-21	0.558
17:885-907	8mer	0.008
17:352-374	7mer	0.003
17:688-706	6mer	0.002
17:1311-1334	6mer	0.002
>ENST00000583492	ENSG00000265688(MAFG-AS1)	hsa-miR-4486	-21	0.558
17:848-869	6mer	0.008
17:773-790	6mer	0.004
17:126-148	6mer	0.002
>ENST00000582106	ENSG00000265688(MAFG-AS1)	hsa-miR-503-5p	-21	0.557
17:459-476	7mer	0.008
17:29-42	6mer	0.004
17:1355-1374	6mer	0.002
>ENST00000583492	ENSG00000265688(MAFG-AS1)	hsa-miR-7978	-21	0.557
17:186-209	7mer	0.014
>ENST00000582106	ENSG00000265688(MAFG-AS1)	hsa-miR-579-5p	-21	0.557
17:768-788	8mer	0.012
17:299-319	6mer	0.002
>ENST00000582106	ENSG00000265688(MAFG-AS1)	hsa-miR-4301	-21	0.557
17:1560-1578	7mer	0.006
17:1697-1714	6mer	0.003
17:1176-1195	6mer	0.002
17:999-1018	6mer	0.002
17:1117-1136	6mer	0.001
17:1058-1077	6mer	0.001
>ENST00000583492	ENSG00000265688(MAFG-AS1)	hsa-miR-4723-3p	-21	0.556
17:219-237	7mer	0.01
17:236-252	7mer	0.005
>ENST00000582106	ENSG00000265688(MAFG-AS1)	hsa-miR-2861	-21	0.556
17:411-427	8mer	0.004
17:1459-1477	6mer	0.003
17:802-827	6mer	0.003
17:155-172	8mer+mismatch	0.002
17:1003-1026	6mer	0.001
17:291-315	6mer	0.001
>ENST00000582106	ENSG00000265688(MAFG-AS1)	hsa-miR-6744-3p	-21	0.556
17:802-827	9mer	0.008
17:754-775	6mer	0.003
17:400-426	6mer	0.002
17:886-900	6mer	0.001
>ENST00000582106	ENSG00000265688(MAFG-AS1)	hsa-miR-2682-3p	-21	0.556
17:1425-1449	9mer	0.007
17:1828-1855	7mer	0.003
17:259-283	7mer	0.003
17:808-825	6mer	0.002
>ENST00000583492	ENSG00000265688(MAFG-AS1)	hsa-miR-1825	-21	0.555
17:65-85	8mer	0.011
17:671-693	6mer	0.003
>ENST00000582106	ENSG00000265688(MAFG-AS1)	hsa-miR-6785-5p	-21	0.555
17:1309-1334	9mer	0.006
17:661-684	6mer	0.002
17:351-374	6mer	0.002
17:945-969	6mer	0.001
17:1146-1171	6mer	0.001
17:1083-1099	6mer	0.001
17:1034-1053	7mer	0.001
17:1093-1112	6mer	0
17:975-994	6mer	0
17:1019-1041	6mer	0
17:960-982	6mer	0
>ENST00000582106	ENSG00000265688(MAFG-AS1)	hsa-miR-1184	-21	0.554
17:1732-1747	7mer	0.006
17:1042-1066	7mer	0.004
17:1172-1184	7mer	0.003
17:110-127	6mer	0.002
>ENST00000583492	ENSG00000265688(MAFG-AS1)	hsa-miR-938	-21	0.554
17:790-811	6mer	0.006
17:768-779	6mer	0.005
17:768-784	6mer	0.003
>ENST00000582106	ENSG00000265688(MAFG-AS1)	hsa-miR-4283	-21	0.553
17:1079-1087	8mer	0.004
17:1138-1146	8mer	0.003
17:100-114	6mer	0.003
17:1167-1176	6mer	0.001
17:983-999	6mer	0.001
17:1108-1117	6mer	0.001
17:1049-1058	6mer	0.001
>ENST00000582106	ENSG00000265688(MAFG-AS1)	hsa-miR-526b-3p	-21	0.553
17:1546-1564	8mer	0.011
17:528-550	6mer	0.003
>ENST00000583492	ENSG00000265688(MAFG-AS1)	hsa-miR-1343-3p	-21	0.553
17:138-150	7mer	0.008
17:351-363	7mer	0.006
>ENST00000582106	ENSG00000265688(MAFG-AS1)	hsa-miR-6887-3p	-21	0.553
17:576-594	8mer	0.012
17:363-385	6mer	0.002
>ENST00000582106	ENSG00000265688(MAFG-AS1)	hsa-miR-6742-3p	-21	0.552
17:1712-1732	6mer	0.003
17:74-98	6mer	0.002
17:406-423	6mer	0.002
17:1171-1178	6mer	0.002
17:1311-1336	6mer	0.002
17:983-1001	6mer	0.001
17:1112-1119	6mer	0.001
17:1037-1060	6mer	0.001
>ENST00000583492	ENSG00000265688(MAFG-AS1)	hsa-miR-30b-3p	-21	0.552
17:623-645	8mer	0.007
17:846-868	6mer	0.007
>ENST00000583492	ENSG00000265688(MAFG-AS1)	hsa-miR-6760-5p	-21	0.552
17:314-337	7mer	0.01
17:596-622	8mer	0.004
>ENST00000582106	ENSG00000265688(MAFG-AS1)	hsa-miR-4690-3p	-21	0.552
17:1357-1372	7mer	0.005
17:1730-1745	6mer	0.003
17:626-650	6mer	0.001
17:982-1005	6mer	0.001
17:1160-1182	6mer	0.001
17:1101-1123	6mer	0.001
17:1041-1064	6mer	0.001
>ENST00000582106	ENSG00000265688(MAFG-AS1)	hsa-miR-4270	-21	0.55
17:1294-1313	7mer	0.006
17:890-909	7mer	0.004
17:716-735	6mer	0.003
17:9-28	6mer	0.001
>ENST00000582106	ENSG00000265688(MAFG-AS1)	hsa-miR-6836-5p	-21	0.55
17:1280-1304	7mer	0.006
17:254-271	8mer	0.005
17:301-318	8mer+mismatch	0.001
17:416-434	6mer	0.001
17:137-155	6mer	0.001
>ENST00000583492	ENSG00000265688(MAFG-AS1)	hsa-miR-4700-5p	-21	0.55
17:91-115	7mer	0.004
17:764-789	6mer	0.004
17:581-594	6mer	0.003
17:462-488	6mer	0.002
17:410-429	6mer	0.001
>ENST00000583492	ENSG00000265688(MAFG-AS1)	hsa-miR-920	-21	0.55
17:116-135	9mer	0.011
17:312-336	6mer	0.003
>ENST00000582106	ENSG00000265688(MAFG-AS1)	hsa-miR-4695-5p	-21	0.549
17:1201-1225	7mer	0.005
17:941-965	8mer	0.004
17:135-153	8mer+mismatch	0.002
17:1854-1868	6mer	0.002
17:675-696	6mer	0.001
>ENST00000582106	ENSG00000265688(MAFG-AS1)	hsa-miR-4728-5p	-21	0.549
17:1311-1334	8mer	0.006
17:658-684	6mer	0.002
17:352-374	6mer	0.002
17:1154-1171	6mer	0.001
17:1079-1099	6mer	0.001
17:1029-1053	7mer	0.001
17:1088-1112	6mer	0.001
17:970-994	6mer	0.001
17:959-982	6mer	0.001
17:1020-1041	6mer	0
>ENST00000582106	ENSG00000265688(MAFG-AS1)	hsa-miR-3692-5p	-21	0.548
17:1215-1235	6mer	0.005
17:598-616	7mer	0.004
17:353-378	7mer	0.003
17:387-406	6mer	0.002
>ENST00000583492	ENSG00000265688(MAFG-AS1)	hsa-miR-7704	-21	0.548
17:500-521	6mer	0.014
>ENST00000582106	ENSG00000265688(MAFG-AS1)	hsa-miR-326	-21	0.548
17:431-450	7mer	0.007
17:1827-1853	6mer	0.003
17:1373-1391	6mer	0.003
17:255-281	6mer	0.002
>ENST00000582106	ENSG00000265688(MAFG-AS1)	hsa-miR-330-5p	-21	0.548
17:430-450	7mer	0.007
17:1777-1791	6mer	0.003
17:1373-1391	6mer	0.002
17:595-619	6mer	0.002
>ENST00000582106	ENSG00000265688(MAFG-AS1)	hsa-miR-513a-5p	-21	0.547
17:558-581	7mer	0.008
17:1741-1757	6mer	0.006
>ENST00000582106	ENSG00000265688(MAFG-AS1)	hsa-miR-3130-3p	-21	0.547
17:731-750	8mer	0.01
17:1524-1536	7mer	0.003
17:107-128	6mer	0.001
>ENST00000583492	ENSG00000265688(MAFG-AS1)	hsa-miR-4459	-21	0.547
17:512-535	7mer	0.012
17:101-125	7mer	0.002
>ENST00000583492	ENSG00000265688(MAFG-AS1)	hsa-miR-6757-5p	-21	0.547
17:254-275	7mer	0.014
>ENST00000582106	ENSG00000265688(MAFG-AS1)	hsa-miR-27a-3p	-21	0.547
17:568-581	7mer	0.008
17:1732-1757	6mer	0.006
>ENST00000582106	ENSG00000265688(MAFG-AS1)	hsa-miR-505-5p	-21	0.547
17:887-907	9mer	0.006
17:126-152	8mer	0.003
17:347-373	6mer	0.003
17:669-695	6mer	0.001
17:683-706	6mer	0.001
>ENST00000583492	ENSG00000265688(MAFG-AS1)	hsa-miR-3689a-3p	-21	0.546
17:619-645	8mer	0.007
17:845-868	6mer	0.007
>ENST00000582106	ENSG00000265688(MAFG-AS1)	hsa-miR-6776-5p	-21	0.546
17:1270-1284	8mer	0.012
17:423-449	7mer	0.002
>ENST00000583492	ENSG00000265688(MAFG-AS1)	hsa-miR-4687-5p	-21	0.546
17:55-78	8mer	0.011
17:666-681	6mer	0.002
>ENST00000583492	ENSG00000265688(MAFG-AS1)	hsa-miR-5586-5p	-21	0.545
17:375-387	8mer	0.014
>ENST00000583492	ENSG00000265688(MAFG-AS1)	hsa-miR-643	-21	0.545
17:929-951	6mer	0.008
17:703-723	6mer	0.006
>ENST00000582106	ENSG00000265688(MAFG-AS1)	hsa-miR-3150a-3p	-21	0.544
17:670-687	8mer	0.005
17:1454-1479	6mer	0.002
17:685-708	7mer	0.002
17:86-110	6mer	0.002
17:1159-1177	6mer	0.001
17:977-1000	6mer	0.001
17:1095-1118	6mer	0.001
17:1035-1059	6mer	0.001
>ENST00000582106	ENSG00000265688(MAFG-AS1)	hsa-miR-920	-21	0.543
17:359-373	8mer	0.005
17:688-707	9mer	0.005
17:884-908	6mer	0.002
17:1078-1100	8mer+mismatch	0.001
>ENST00000583492	ENSG00000265688(MAFG-AS1)	hsa-miR-3657	-21	0.543
17:152-168	7mer	0.007
17:132-153	6mer	0.006
>ENST00000583492	ENSG00000265688(MAFG-AS1)	hsa-miR-5001-3p	-21	0.542
17:745-767	7mer	0.013
>ENST00000582106	ENSG00000265688(MAFG-AS1)	hsa-miR-1825	-21	0.542
17:637-657	8mer	0.007
17:33-37	6mer	0.004
17:1361-1383	6mer	0.002
>ENST00000582106	ENSG00000265688(MAFG-AS1)	hsa-miR-193a-5p	-21	0.541
17:1186-1210	7mer	0.011
17:389-410	6mer	0.001
17:1352-1379	6mer	0.001
>ENST00000582106	ENSG00000265688(MAFG-AS1)	hsa-miR-767-3p	-21	0.541
17:1206-1232	6mer	0.003
17:1826-1851	6mer	0.003
17:382-407	6mer	0.003
17:591-617	6mer	0.002
17:1211-1236	6mer	0.002
>ENST00000583492	ENSG00000265688(MAFG-AS1)	hsa-miR-3689b-3p	-21	0.54
17:628-645	8mer	0.007
>ENST00000583492	ENSG00000265688(MAFG-AS1)	hsa-miR-3689c	-21	0.54
17:628-645	8mer	0.007
17:844-868	6mer	0.006
17:844-868	6mer	0.006
>ENST00000582106	ENSG00000265688(MAFG-AS1)	hsa-miR-27b-3p	-21	0.54
17:568-581	7mer	0.008
17:1738-1757	6mer	0.005
>ENST00000582106	ENSG00000265688(MAFG-AS1)	hsa-miR-5591-5p	-21	0.539
17:360-374	8mer	0.008
17:684-706	7mer	0.004
17:1317-1334	6mer	0.002
>ENST00000583492	ENSG00000265688(MAFG-AS1)	hsa-miR-4487	-21	0.539
17:117-132	8mer	0.013
>ENST00000582106	ENSG00000265688(MAFG-AS1)	hsa-miR-4437	-21	0.539
17:1569-1594	7mer	0.006
17:1066-1085	8mer	0.003
17:694-719	7mer	0.002
17:1125-1144	8mer	0.002
>ENST00000583492	ENSG00000265688(MAFG-AS1)	hsa-miR-7155-5p	-21	0.539
17:777-789	8mer+wobble	0.006
17:98-115	6mer	0.003
17:479-488	6mer	0.002
17:408-429	6mer	0.002
>ENST00000583492	ENSG00000265688(MAFG-AS1)	hsa-miR-1254	-21	0.539
17:612-632	7mer	0.009
17:472-490	7mer	0.003
17:410-431	7mer	0.002
>ENST00000583492	ENSG00000265688(MAFG-AS1)	hsa-miR-3124-5p	-21	0.539
17:202-217	7mer	0.013
>ENST00000582106	ENSG00000265688(MAFG-AS1)	hsa-miR-4456	-21	0.538
17:771-780	8mer	0.013
>ENST00000583492	ENSG00000265688(MAFG-AS1)	hsa-miR-345-5p	-21	0.537
17:782-807	8mer	0.013
>ENST00000583492	ENSG00000265688(MAFG-AS1)	hsa-miR-6738-3p	-21	0.536
17:743-767	7mer	0.013
>ENST00000583492	ENSG00000265688(MAFG-AS1)	hsa-miR-520a-3p	-21	0.536
17:855-874	8mer	0.013
>ENST00000583492	ENSG00000265688(MAFG-AS1)	hsa-miR-4689	-21	0.536
17:85-106	8mer	0.013
>ENST00000582106	ENSG00000265688(MAFG-AS1)	hsa-miR-3196	-21	0.536
17:591-609	9mer	0.004
17:983-998	7mer	0.002
17:1161-1175	7mer	0.002
17:1102-1116	7mer	0.001
17:1042-1057	7mer	0.001
17:297-316	6mer	0.001
17:1067-1087	6mer	0.001
17:1134-1146	6mer	0.001
>ENST00000582106	ENSG00000265688(MAFG-AS1)	hsa-miR-6505-5p	-21	0.535
17:1488-1508	7mer	0.007
17:306-325	7mer	0.004
17:816-839	6mer	0.002
>ENST00000582106	ENSG00000265688(MAFG-AS1)	hsa-miR-4700-5p	-21	0.535
17:1454-1479	6mer	0.002
17:91-110	6mer	0.002
17:1271-1284	6mer	0.002
17:663-687	7mer	0.002
17:431-449	6mer	0.002
17:982-1001	6mer	0.001
17:1152-1178	6mer	0.001
17:1093-1119	6mer	0.001
17:1044-1060	6mer	0.001
>ENST00000583492	ENSG00000265688(MAFG-AS1)	hsa-miR-4292	-21	0.535
17:633-647	7mer	0.005
17:659-678	7mer	0.004
17:720-737	6mer	0.003
>ENST00000583492	ENSG00000265688(MAFG-AS1)	hsa-miR-4301	-21	0.535
17:870-888	7mer	0.007
17:427-446	6mer	0.003
17:486-505	6mer	0.003
>ENST00000582106	ENSG00000265688(MAFG-AS1)	hsa-miR-30c-1-3p	-21	0.535
17:1536-1558	6mer	0.004
17:349-375	7mer	0.003
17:1669-1691	6mer	0.003
17:1313-1335	7mer	0.002
>ENST00000582106	ENSG00000265688(MAFG-AS1)	hsa-miR-6728-3p	-21	0.534
17:592-619	8mer	0.006
17:1827-1853	7mer	0.005
17:262-281	6mer	0.002
>ENST00000582106	ENSG00000265688(MAFG-AS1)	hsa-miR-7106-5p	-21	0.534
17:1309-1334	7mer	0.002
17:944-969	8mer	0.002
17:353-374	6mer	0.002
17:666-684	6mer	0.002
17:1144-1171	7mer	0.001
17:1085-1112	7mer	0.001
17:967-994	7mer	0.001
17:1075-1099	6mer	0.001
17:1026-1053	6mer	0
17:1022-1041	6mer	0
17:961-982	6mer	0
>ENST00000582106	ENSG00000265688(MAFG-AS1)	hsa-miR-4524a-3p	-21	0.534
17:1520-1543	7mer	0.011
17:36-63	6mer	0.002
>ENST00000583492	ENSG00000265688(MAFG-AS1)	hsa-miR-648	-21	0.534
17:265-290	7mer	0.008
17:138-155	6mer	0.005
>ENST00000582106	ENSG00000265688(MAFG-AS1)	hsa-miR-6132	-21	0.534
17:1288-1305	9mer	0.009
17:255-271	7mer	0.004
>ENST00000582106	ENSG00000265688(MAFG-AS1)	hsa-miR-152-5p	-21	0.533
17:1780-1795	7mer	0.008
17:771-784	7mer	0.004
>ENST00000583492	ENSG00000265688(MAFG-AS1)	hsa-miR-1273h-5p	-21	0.533
17:626-645	8mer	0.007
17:843-868	6mer	0.006
>ENST00000582106	ENSG00000265688(MAFG-AS1)	hsa-miR-4430	-21	0.533
17:1764-1779	9mer	0.005
17:1286-1300	7mer	0.005
17:100-112	6mer	0.002
>ENST00000582106	ENSG00000265688(MAFG-AS1)	hsa-miR-646	-21	0.532
17:456-477	7mer	0.007
17:16-42	6mer	0.004
17:1357-1373	6mer	0.002
>ENST00000582106	ENSG00000265688(MAFG-AS1)	hsa-miR-6843-3p	-21	0.531
17:1591-1608	7mer	0.013
>ENST00000583492	ENSG00000265688(MAFG-AS1)	hsa-miR-6762-3p	-21	0.531
17:161-180	7mer	0.01
17:534-555	6mer	0.002
>ENST00000582106	ENSG00000265688(MAFG-AS1)	hsa-miR-6872-3p	-21	0.531
17:1432-1452	8mer+wobble	0.008
17:1660-1669	7mer	0.005
>ENST00000582106	ENSG00000265688(MAFG-AS1)	hsa-miR-1321	-21	0.53
17:893-909	7mer	0.005
17:708-734	6mer	0.003
17:1294-1312	7mer	0.002
17:1087-1099	8mer+mismatch	0.001
17:969-981	8mer+mismatch	0.001
17:1028-1040	8mer+mismatch	0.001
>ENST00000583492	ENSG00000265688(MAFG-AS1)	hsa-miR-148b-3p	-21	0.53
17:732-752	7mer	0.013
>ENST00000582106	ENSG00000265688(MAFG-AS1)	hsa-miR-6848-3p	-21	0.53
17:1595-1608	7mer	0.013
>ENST00000583492	ENSG00000265688(MAFG-AS1)	hsa-miR-6864-3p	-21	0.529
17:259-280	6mer	0.007
17:828-853	6mer	0.006
>ENST00000583492	ENSG00000265688(MAFG-AS1)	hsa-miR-6883-5p	-21	0.529
17:627-643	7mer	0.006
17:315-336	6mer	0.005
17:373-396	6mer	0.002
>ENST00000583492	ENSG00000265688(MAFG-AS1)	hsa-miR-615-5p	-21	0.529
17:498-521	6mer	0.013
>ENST00000582106	ENSG00000265688(MAFG-AS1)	hsa-miR-4258	-21	0.529
17:47-58	8mer	0.005
17:1844-1857	6mer	0.003
17:50-71	6mer	0.002
17:337-356	7mer	0.001
17:337-351	6mer	0.001
>ENST00000583492	ENSG00000265688(MAFG-AS1)	hsa-miR-372-3p	-21	0.528
17:848-874	9mer	0.011
17:448-465	6mer	0.002
>ENST00000583492	ENSG00000265688(MAFG-AS1)	hsa-miR-520b	-21	0.528
17:857-874	8mer	0.013
>ENST00000583492	ENSG00000265688(MAFG-AS1)	hsa-miR-6088	-21	0.528
17:277-296	7mer	0.008
17:639-665	7mer	0.004
>ENST00000582106	ENSG00000265688(MAFG-AS1)	hsa-miR-6846-3p	-21	0.528
17:1420-1430	8mer	0.008
17:309-335	6mer	0.003
17:44-60	6mer	0.002
>ENST00000582106	ENSG00000265688(MAFG-AS1)	hsa-miR-8089	-21	0.528
17:1459-1479	6mer	0.002
17:661-687	7mer	0.002
17:91-110	6mer	0.002
17:979-1001	7mer	0.001
17:1311-1336	6mer	0.001
17:1154-1178	7mer	0.001
17:400-423	6mer	0.001
17:695-721	6mer	0.001
17:1096-1119	7mer	0.001
17:1038-1060	7mer	0.001
>ENST00000582106	ENSG00000265688(MAFG-AS1)	hsa-miR-6894-5p	-21	0.528
17:1843-1868	7mer	0.002
17:541-556	6mer	0.002
17:1154-1169	8mer	0.002
17:1853-1870	6mer	0.002
17:1197-1224	7mer	0.002
17:1091-1110	8mer	0.001
17:947-967	6mer	0.001
17:973-992	8mer	0.001
>ENST00000583492	ENSG00000265688(MAFG-AS1)	hsa-miR-520c-3p	-21	0.527
17:855-874	8mer	0.013
>ENST00000582106	ENSG00000265688(MAFG-AS1)	hsa-miR-504-3p	-21	0.527
17:1750-1774	8mer	0.009
17:1293-1310	8mer+mismatch	0.002
17:832-855	6mer	0.002
>ENST00000582106	ENSG00000265688(MAFG-AS1)	hsa-miR-3160-3p	-21	0.527
17:196-211	6mer	0.004
17:350-371	6mer	0.003
17:1853-1863	6mer	0.003
17:688-704	6mer	0.002
>ENST00000583492	ENSG00000265688(MAFG-AS1)	hsa-miR-33b-3p	-21	0.527
17:735-751	7mer	0.008
17:74-84	7mer	0.003
17:444-464	7mer	0.001
>ENST00000582106	ENSG00000265688(MAFG-AS1)	hsa-miR-3664-3p	-21	0.526
17:1214-1228	9mer	0.011
17:792-806	6mer	0.002
>ENST00000583492	ENSG00000265688(MAFG-AS1)	hsa-miR-767-3p	-21	0.526
17:516-542	6mer	0.005
17:521-546	6mer	0.004
17:19-45	6mer	0.004
>ENST00000582106	ENSG00000265688(MAFG-AS1)	hsa-miR-4508	-21	0.526
17:1072-1088	8mer	0.004
17:1131-1147	8mer	0.003
17:597-610	7mer	0.003
17:302-317	7mer	0.002
17:369-395	6mer	0.001
>ENST00000583492	ENSG00000265688(MAFG-AS1)	hsa-miR-759	-21	0.526
17:66-91	6mer	0.006
17:644-667	6mer	0.003
17:337-352	6mer	0.003
>ENST00000583492	ENSG00000265688(MAFG-AS1)	hsa-miR-6858-5p	-21	0.526
17:87-107	8mer	0.012
>ENST00000583492	ENSG00000265688(MAFG-AS1)	hsa-miR-6894-3p	-21	0.526
17:621-634	6mer	0.005
17:440-462	7mer	0.004
17:382-403	7mer	0.003
>ENST00000583492	ENSG00000265688(MAFG-AS1)	hsa-miR-6787-5p	-21	0.525
17:27-40	8mer	0.012
>ENST00000582106	ENSG00000265688(MAFG-AS1)	hsa-miR-552-3p	-21	0.525
17:1668-1684	8mer	0.012
>ENST00000583492	ENSG00000265688(MAFG-AS1)	hsa-miR-767-5p	-21	0.525
17:161-176	7mer	0.01
17:828-845	6mer	0.002
>ENST00000583492	ENSG00000265688(MAFG-AS1)	hsa-miR-939-3p	-21	0.524
17:123-149	7mer	0.008
17:621-647	7mer	0.004
[truncated: 367 more rows]
